# Supplementary material
Source: publisher figshare collection journal article supplement (https://future-science-group.figshare.com/ndownloader/files/31127644)
Supplement: Supplementary file 1 [file 31127644]

## Sheet: dna_methylation
Chr.c	Chr_start	Chr_end	GeneIDb	Tissue	Mean valuedParkinson	Mean valuedcontrol	Differencee	pvalue	PMID
2	-	-		peripheral blood mononuclear cell	53.9	66.58	-11.31	5740000000000	27709425
2	-	-	SFT2D3	peripheral blood mononuclear cell	54.91	70.33	-14.44	6060000000000	27709425
16	-	-	TNFRSF17	peripheral blood mononuclear cell	87.79	92.74	-2.84	963000000000	27709425
5	-	-	PDE4D	peripheral blood mononuclear cell	70.12	57.81	11.9	14700000000	27709425
8	-	-	BLK	peripheral blood mononuclear cell	81.98	89.48	-3.42	14700000000	27709425
16	-	-	IRF8	peripheral blood mononuclear cell	58.91	68.63	-6.75	14700000000	27709425
1	-	-		peripheral blood mononuclear cell	92.64	88.43	3.67	21900000000	27709425
6	-	-	CPNE5	peripheral blood mononuclear cell	86.45	92.92	-3.61	26000000000	27709425
17	-	-	MAPT	peripheral blood mononuclear cell	67.46	77.35	-8.46	28400000000	27709425
10	-	-	PRF1	peripheral blood mononuclear cell	86.58	91.19	-3.46	43000000000	27709425
2	-	-		peripheral blood mononuclear cell	55.4	41.29	10.94	44600000000	27709425
12	-	-	DYRK4	peripheral blood mononuclear cell	36.75	20.38	9.52	1800000000	27709425
3	-	-	LPP	peripheral blood mononuclear cell	47.25	60.29	-12.2	2770000000	27709425
1	-	-	PPAP2B	peripheral blood mononuclear cell	38.16	24.77	7.84	3810000000	27709425
X	-	-	CDKL5	peripheral blood mononuclear cell	41.75	26.96	9.2	122000000	27709425
6	-	-	LY86	peripheral blood mononuclear cell	58	70.68	-8.05	122000000	27709425
5	-	-	TRIO	peripheral blood mononuclear cell	78.59	71.21	7.72	122000000	27709425
2	-	-	SFT2D3	peripheral blood mononuclear cell	82.22	88.11	-4.25	145000000	27709425
7	-	-	AKR1D1	peripheral blood mononuclear cell	39.15	47.48	6.68	358000000	27709425
19	-	-		peripheral blood mononuclear cell	28.76	37.63	-10.16	506000000	27709425
6	-	-		peripheral blood mononuclear cell	59.33	70.93	-6.68	1020000	27709425
17	-	-	MAPT	peripheral blood mononuclear cell	74.9	68.77	9.48	1430000	27709425
20	-	-	PCIF1	peripheral blood mononuclear cell	34.54	39.35	-4.86	6600000	27709425
19	-	-	CD33	peripheral blood mononuclear cell	14.57	11.53	1.52	458000	27709425
19	-	-	GPX4	peripheral blood mononuclear cell	85.53	82.57	3.97	0.0001	27709425
12	-	-	DHX37	peripheral blood mononuclear cell	75.07	66.2	7.24	0.0002	27709425
3	-	-	GPX1	peripheral blood mononuclear cell	7.9	6.98	0.49	0.0003	27709425
9	-	-	BICD2	peripheral blood mononuclear cell	92.84	91.17	1.61	0.0003	27709425
3	-	-	GPX1	peripheral blood mononuclear cell	48.52	55.87	-3.79	0.0006	27709425
4	-	-	SNCA	peripheral blood mononuclear cell	20.28	17.54	2.11	0.002	27709425
6	-	-	HLA-DRB5	peripheral blood mononuclear cell	77.12	69.28	11.25	0.002	27709425
4	-	-	BST1	peripheral blood mononuclear cell	10.07	8.64	1.13	0.002	27709425
4	-	-	SNCA	peripheral blood mononuclear cell	17.56	17.3	1.87	0.01	27709425
3	-	-	ALG1L	Brain	-	-	-0.23	0.01	23907097
7	-	-	AMZ1	Brain	-	-	-0.24	0.01	23907097
15	-	-	ANXA2	Brain	-	-	-0.23	0.01	23907097
9	-	-	APBA1	Brain	-	-	-0.31	0.01	23907097
10	-	-	ARHGAP22	Brain	-	-	-0.26	0.01	23907097
11	-	-	ARHGEF12	Brain	-	-	-0.3	0.01	23907097
13	-	-	ATP8A2	Brain	-	-	-0.24	0.01	23907097
12	-	-	B4GALNT3	Brain	-	-	-0.21	0.01	23907097
12	-	-	B4GALNT3	Brain	-	-	-0.21	0.01	23907097
20	-	-	BANF2	Brain	-	-	-0.24	0.01	23907097
10	-	-	C10orf58	Brain	-	-	-0.22	0.01	23907097
10	-	-	C10orf71	Brain	-	-	-0.2	0.01	23907097
17	-	-	C17orf57	Brain	-	-	-0.21	0.01	23907097
1	-	-	C1orf52	Brain	-	-	-0.2	0.01	23907097
21	-	-	C21orf56	Brain	-	-	-0.21	0.01	23907097
3	-	-	C3orf21	Brain	-	-	-0.22	0.01	23907097
1	-	-	CAPN8	Brain	-	-	-0.32	0.01	23907097
6	-	-	CCR6	Brain	-	-	-0.21	0.01	23907097
12	-	-	CLECL1	Brain	-	-	-0.24	0.01	23907097
7	-	-	CNTNAP2	Brain	-	-	-0.26	0.01	23907097
6	-	-	COL11A2	Brain	-	-	-0.22	0.01	23907097
19	-	-	CPAMD8	Brain	-	-	-0.25	0.01	23907097
2	-	-	CTNNA2	Brain	-	-	-0.27	0.01	23907097
5	-	-	CYFIP2	Brain	-	-	-0.21	0.01	23907097
13	-	-	DCUN1D2	Brain	-	-	-0.31	0.01	23907097
2	-	-	DIRC3	Brain	-	-	-0.22	0.01	23907097
1	-	-	DMBX1	Brain	-	-	-0.37	0.01	23907097
16	-	-	DNAJA3	Brain	-	-	-0.45	0.01	23907097
6	-	-	DSE	Brain	-	-	-0.26	0.01	23907097
1	-	-	ESRRG	Brain	-	-	-0.23	0.01	23907097
1	-	-	FAM132A	Brain	-	-	-0.23	0.01	23907097
7	-	-	FOXK1	Brain	-	-	-0.32	0.01	23907097
6	-	-	FRK	Brain	-	-	-0.39	0.01	23907097
4	-	-	GPR125	Brain	-	-	-0.31	0.01	23907097
22	-	-	GSTT1	Brain	-	-	-0.24	0.01	23907097
22	-	-	GSTT1	Brain	-	-	-0.22	0.01	23907097
19	-	-	GZMM	Brain	-	-	-0.22	0.01	23907097
6	-	-	HLA-DRB1	Brain	-	-	-0.41	0.01	23907097
6	-	-	HLA-DRB1	Brain	-	-	-0.26	0.01	23907097
6	-	-	HLA-DRB1	Brain	-	-	-0.22	0.01	23907097
6	-	-	HLA-G	Brain	-	-	-0.23	0.01	23907097
10	-	-	JAKMIP3	Brain	-	-	-0.5	0.01	23907097
10	-	-	JAKMIP3	Brain	-	-	-0.31	0.01	23907097
1	-	-	KCNH1	Brain	-	-	-0.25	0.01	23907097
16	-	-	KIAA0513	Brain	-	-	-0.26	0.01	23907097
19	-	-	LGALS7	Brain	-	-	-0.37	0.01	23907097
12	-	-	LOC100292680	Brain	-	-	-0.24	0.01	23907097
22	-	-	LOC391322	Brain	-	-	-0.32	0.01	23907097
10	-	-	LRRC27	Brain	-	-	-0.38	0.01	23907097
15	-	-	LRRK1	Brain	-	-	-0.22	0.01	23907097
7	-	-	MAGI2	Brain	-	-	-0.31	0.01	23907097
4	-	-	MAPK10	Brain	-	-	-0.2	0.01	23907097
5	-	-	MCC	Brain	-	-	-0.22	0.01	23907097
5	-	-	MIR886	Brain	-	-	-0.24	0.01	23907097
5	-	-	MIR886	Brain	-	-	-0.23	0.01	23907097
5	-	-	MIR886	Brain	-	-	-0.21	0.01	23907097
5	-	-	MIR886	Brain	-	-	-0.21	0.01	23907097
5	-	-	MIR886	Brain	-	-	-0.21	0.01	23907097
5	-	-	MIR886	Brain	-	-	-0.2	0.01	23907097
1	-	-	MMEL1	Brain	-	-	-0.23	0.01	23907097
3	-	-	MRPL3	Brain	-	-	-0.22	0.01	23907097
8	-	-	MYOM2	Brain	-	-	-0.25	0.01	23907097
8	-	-	MYOM2	Brain	-	-	-0.21	0.01	23907097
2	-	-	NDUFA10	Brain	-	-	-0.23	0.01	23907097
1	-	-	NPHP4	Brain	-	-	-0.25	0.01	23907097
11	-	-	NTM	Brain	-	-	-0.22	0.01	23907097
6	-	-	OPRM1	Brain	-	-	-0.32	0.01	23907097
1	-	-	OR10K1	Brain	-	-	-0.22	0.01	23907097
6	-	-	OR12D3	Brain	-	-	-0.28	0.01	23907097
1	-	-	PCSK9	Brain	-	-	-0.24	0.01	23907097
19	-	-	PIK3R2	Brain	-	-	-0.23	0.01	23907097
7	-	-	PTPRN2	Brain	-	-	-0.22	0.01	23907097
10	-	-	PWWP2B	Brain	-	-	-0.22	0.01	23907097
12	-	-	PYROXD1	Brain	-	-	-0.23	0.01	23907097
12	-	-	RHOF	Brain	-	-	-0.21	0.01	23907097
10	-	-	SH3PXD2A	Brain	-	-	-0.24	0.01	23907097
1	-	-	SLC25A24	Brain	-	-	-0.25	0.01	23907097
12	-	-	SLC26A10	Brain	-	-	-0.2	0.01	23907097
6	-	-	SMOC2	Brain	-	-	-0.22	0.01	23907097
1	-	-	SMYD3	Brain	-	-	-0.21	0.01	23907097
2	-	-	SPATS2L	Brain	-	-	-0.22	0.01	23907097
19	-	-	SPTBN4	Brain	-	-	-0.24	0.01	23907097
2	-	-	STEAP3	Brain	-	-	-0.36	0.01	23907097
11	-	-	STT3A	Brain	-	-	-0.26	0.01	23907097
5	-	-	TGFBI	Brain	-	-	-0.26	0.01	23907097
9	-	-	TLE1	Brain	-	-	-0.21	0.01	23907097
13	-	-	TMCO3	Brain	-	-	-0.21	0.01	23907097
9	-	-	TNFSF8	Brain	-	-	-0.23	0.01	23907097
6	-	-	TRIM27	Brain	-	-	-0.21	0.01	23907097
12	-	-	TSPAN9	Brain	-	-	-0.25	0.01	23907097
2	-	-	TUBA3E	Brain	-	-	-0.21	0.01	23907097
6	-	-	WDR27	Brain	-	-	-0.22	0.01	23907097
19	-	-	XAB2	Brain	-	-	-0.23	0.01	23907097
7	-	-	ZNF117	Brain	-	-	-0.27	0.01	23907097
17	-	-	AATF	Brain	-	-	0.22	0.01	23907097
16	-	-	ABCA3	Brain	-	-	0.26	0.01	23907097
14	-	-	AKAP6	Brain	-	-	0.22	0.01	23907097
8	-	-	ARHGEF10	Brain	-	-	0.32	0.01	23907097
5	-	-	ARSB	Brain	-	-	0.22	0.01	23907097
2	-	-	ASAP2	Brain	-	-	0.24	0.01	23907097
17	-	-	ATP2A3	Brain	-	-	0.24	0.01	23907097
16	-	-	BANP	Brain	-	-	0.25	0.01	23907097
9	-	-	BICD2	Brain	-	-	0.27	0.01	23907097
10	-	-	C10orf46	Brain	-	-	0.22	0.01	23907097
14	-	-	C14orf126	Brain	-	-	0.3	0.01	23907097
2	-	-	COL6A3	Brain	-	-	0.24	0.01	23907097
6	-	-	COQ3	Brain	-	-	0.22	0.01	23907097
5	-	-	CPLX2	Brain	-	-	0.2	0.01	23907097
1	-	-	CR1L	Brain	-	-	0.24	0.01	23907097
2	-	-	CUL3	Brain	-	-	0.21	0.01	23907097
17	-	-	DNAH9	Brain	-	-	0.22	0.01	23907097
17	-	-	ERAL1	Brain	-	-	0.24	0.01	23907097
4	-	-	FAT1	Brain	-	-	0.21	0.01	23907097
1	-	-	FCRLA	Brain	-	-	0.21	0.01	23907097
3	-	-	FHIT	Brain	-	-	0.25	0.01	23907097
14	-	-	FLJ31306	Brain	-	-	0.24	0.01	23907097
11	-	-	FLJ32810	Brain	-	-	0.32	0.01	23907097
10	-	-	FLJ37201	Brain	-	-	0.25	0.01	23907097
7	-	-	GCK	Brain	-	-	0.22	0.01	23907097
5	-	-	GFPT2	Brain	-	-	0.32	0.01	23907097
5	-	-	GFPT2	Brain	-	-	0.26	0.01	23907097
5	-	-	GFPT2	Brain	-	-	0.28	0.01	23907097
5	-	-	GFPT2	Brain	-	-	0.31	0.01	23907097
22	-	-	GSTTP1	Brain	-	-	0.22	0.01	23907097
22	-	-	GSTTP2	Brain	-	-	0.22	0.01	23907097
6	-	-	HLA-DPB2	Brain	-	-	0.27	0.01	23907097
6	-	-	HLA-DQA1	Brain	-	-	0.44	0.01	23907097
6	-	-	HLA-DQA1	Brain	-	-	0.21	0.01	23907097
6	-	-	HLA-DQB1	Brain	-	-	0.22	0.01	23907097
6	-	-	HLA-DRB1	Brain	-	-	0.22	0.01	23907097
6	-	-	HLA-DRB1	Brain	-	-	0.35	0.01	23907097
6	-	-	HLA-DRB1	Brain	-	-	0.22	0.01	23907097
6	-	-	HLA-DRB1	Brain	-	-	0.22	0.01	23907097
6	-	-	HLA-DRB1	Brain	-	-	0.26	0.01	23907097
6	-	-	HLA-DRB5	Brain	-	-	0.27	0.01	23907097
6	-	-	HLA-DRB5	Brain	-	-	0.23	0.01	23907097
6	-	-	HLA-DRB5	Brain	-	-	0.34	0.01	23907097
6	-	-	HLA-DRB6	Brain	-	-	0.21	0.01	23907097
6	-	-	HLA-DRB6	Brain	-	-	0.23	0.01	23907097
6	-	-	HLA-DRB6	Brain	-	-	0.28	0.01	23907097
3	-	-	ITPR1	Brain	-	-	0.21	0.01	23907097
16	-	-	KCTD5	Brain	-	-	0.43	0.01	23907097
15	-	-	LASS3	Brain	-	-	0.23	0.01	23907097
2	-	-	LIMS1	Brain	-	-	0.21	0.01	23907097
11	-	-	LOC283267	Brain	-	-	0.38	0.01	23907097
15	-	-	LRRK1	Brain	-	-	0.29	0.01	23907097
11	-	-	MAML2	Brain	-	-	0.2	0.01	23907097
17	-	-	MAPT	Brain	-	-	0.24	0.01	23907097
17	-	-	MAPT	Brain	-	-	0.25	0.01	23907097
1	-	-	MMEL1	Brain	-	-	0.28	0.01	23907097
6	-	-	MOG	Brain	-	-	0.36	0.01	23907097
4	-	-	MORF4	Brain	-	-	0.23	0.01	23907097
19	-	-	MRI1	Brain	-	-	0.26	0.01	23907097
1	-	-	OPRD1	Brain	-	-	0.26	0.01	23907097
1	-	-	OSBPL9	Brain	-	-	0.21	0.01	23907097
21	-	-	PFKL	Brain	-	-	0.22	0.01	23907097
10	-	-	PPIF	Brain	-	-	0.3	0.01	23907097
13	-	-	PRHOXNB	Brain	-	-	0.34	0.01	23907097
16	-	-	PRM1	Brain	-	-	0.22	0.01	23907097
8	-	-	PVT1	Brain	-	-	0.24	0.01	23907097
13	-	-	RASA3	Brain	-	-	0.21	0.01	23907097
6	-	-	RNF39	Brain	-	-	0.22	0.01	23907097
14	-	-	SERPINA9	Brain	-	-	0.2	0.01	23907097
20	-	-	SLC12A5	Brain	-	-	0.28	0.01	23907097
22	-	-	SMC1B	Brain	-	-	0.27	0.01	23907097
6	-	-	TCP10L2	Brain	-	-	0.21	0.01	23907097
17	-	-	TIMP2	Brain	-	-	0.23	0.01	23907097
12	-	-	TMEM132B	Brain	-	-	0.21	0.01	23907097
1	-	-	TMEM9	Brain	-	-	0.27	0.01	23907097
20	-	-	TOX2	Brain	-	-	0.23	0.01	23907097
7	-	-	TPK1	Brain	-	-	0.24	0.01	23907097
22	-	-	TRABD	Brain	-	-	0.2	0.01	23907097
6	-	-	TRIM10	Brain	-	-	0.35	0.01	23907097
4	-	-	TRIML2	Brain	-	-	0.21	0.01	23907097
16	-	-	USP7	Brain	-	-	0.2	0.01	23907097
6	-	-	UST	Brain	-	-	0.27	0.01	23907097
9	-	-	VAV2	Brain	-	-	0.37	0.01	23907097
1	-	-	VPS72	Brain	-	-	0.25	0.01	23907097
14	-	-	VSX2	Brain	-	-	0.24	0.01	23907097
12	-	-	WDR66	Brain	-	-	0.24	0.01	23907097
12	-	-	WDR66	Brain	-	-	0.2	0.01	23907097
11	-	-	YAP1	Brain	-	-	0.21	0.01	23907097
7	-	-	ZNF783	Brain	-	-	0.21	0.01	23907097
6	-	-	ACAT2	PBLs	-	-	-0.21	0.01	23907097
6	-	-	ACAT2	PBLs	-	-	-0.2	0.01	23907097
7	-	-	AMZ1	PBLs	-	-	-0.25	0.01	23907097
15	-	-	ANXA2	PBLs	-	-	-0.24	0.01	23907097
9	-	-	APBA1	PBLs	-	-	-0.28	0.01	23907097
11	-	-	ARHGEF12	PBLs	-	-	-0.3	0.01	23907097
13	-	-	ATP8A2	PBLs	-	-	-0.22	0.01	23907097
20	-	-	BANF2	PBLs	-	-	-0.29	0.01	23907097
14	-	-	C14orf119	PBLs	-	-	-0.23	0.01	23907097
6	-	-	C6orf10	PBLs	-	-	-0.22	0.01	23907097
1	-	-	CAPN8	PBLs	-	-	-0.31	0.01	23907097
1	-	-	CATSPER4	PBLs	-	-	-0.21	0.01	23907097
1	-	-	CATSPER4	PBLs	-	-	-0.23	0.01	23907097
1	-	-	CNST	PBLs	-	-	-0.29	0.01	23907097
7	-	-	CNTNAP2	PBLs	-	-	-0.26	0.01	23907097
6	-	-	COL11A2	PBLs	-	-	-0.21	0.01	23907097
19	-	-	CPAMD8	PBLs	-	-	-0.25	0.01	23907097
2	-	-	CTLA4	PBLs	-	-	-0.2	0.01	23907097
2	-	-	CTNNA2	PBLs	-	-	-0.23	0.01	23907097
13	-	-	DCUN1D2	PBLs	-	-	-0.31	0.01	23907097
7	-	-	DFNA5	PBLs	-	-	-0.23	0.01	23907097
10	-	-	DIP2C	PBLs	-	-	-0.21	0.01	23907097
1	-	-	DMBX1	PBLs	-	-	-0.35	0.01	23907097
16	-	-	DNAJA3	PBLs	-	-	-0.51	0.01	23907097
6	-	-	DSE;DSE	PBLs	-	-	-0.26	0.01	23907097
19	-	-	EPS8L1	PBLs	-	-	-0.22	0.01	23907097
1	-	-	FAM132A	PBLs	-	-	-0.21	0.01	23907097
10	-	-	FAM35A	PBLs	-	-	-0.21	0.01	23907097
14	-	-	FCF1	PBLs	-	-	-0.22	0.01	23907097
2	-	-	FIGN	PBLs	-	-	-0.22	0.01	23907097
7	-	-	FOXK1	PBLs	-	-	-0.34	0.01	23907097
6	-	-	FRK	PBLs	-	-	-0.34	0.01	23907097
1	-	-	GALNT2	PBLs	-	-	-0.24	0.01	23907097
10	-	-	GPR123	PBLs	-	-	-0.21	0.01	23907097
22	-	-	GSTT1	PBLs	-	-	-0.27	0.01	23907097
22	-	-	GSTT1	PBLs	-	-	-0.21	0.01	23907097
19	-	-	GZMM	PBLs	-	-	-0.23	0.01	23907097
15	-	-	HCN4	PBLs	-	-	-0.2	0.01	23907097
6	-	-	HLA-DQB1	PBLs	-	-	-0.25	0.01	23907097
6	-	-	HLA-DQB1	PBLs	-	-	-0.3	0.01	23907097
6	-	-	HLA-DRB1	PBLs	-	-	-0.44	0.01	23907097
6	-	-	HLA-DRB1	PBLs	-	-	-0.21	0.01	23907097
6	-	-	HLA-DRB1	PBLs	-	-	-0.21	0.01	23907097
6	-	-	HLA-DRB1	PBLs	-	-	-0.35	0.01	23907097
6	-	-	HLA-DRB1	PBLs	-	-	-0.21	0.01	23907097
6	-	-	HLA-DRB1	PBLs	-	-	-0.35	0.01	23907097
6	-	-	HLA-G	PBLs	-	-	-0.21	0.01	23907097
6	-	-	HLA-G	PBLs	-	-	-0.23	0.01	23907097
16	-	-	HMOX2	PBLs	-	-	-0.49	0.01	23907097
10	-	-	JAKMIP3	PBLs	-	-	-0.28	0.01	23907097
10	-	-	JAKMIP3	PBLs	-	-	-0.45	0.01	23907097
1	-	-	KCNH1	PBLs	-	-	-0.27	0.01	23907097
16	-	-	KIAA0513	PBLs	-	-	-0.28	0.01	23907097
11	-	-	KLHL35	PBLs	-	-	-0.23	0.01	23907097
19	-	-	LGALS7	PBLs	-	-	-0.38	0.01	23907097
12	-	-	LOC100292680	PBLs	-	-	-0.29	0.01	23907097
2	-	-	LOC375190	PBLs	-	-	-0.21	0.01	23907097
22	-	-	LOC391322	PBLs	-	-	-0.33	0.01	23907097
22	-	-	LOC391322	PBLs	-	-	-0.2	0.01	23907097
10	-	-	LRRC27	PBLs	-	-	-0.41	0.01	23907097
15	-	-	LRRK1	PBLs	-	-	-0.31	0.01	23907097
7	-	-	MAGI2	PBLs	-	-	-0.23	0.01	23907097
8	-	-	MAL2	PBLs	-	-	-0.24	0.01	23907097
4	-	-	MAPK10	PBLs	-	-	-0.2	0.01	23907097
5	-	-	MCC	PBLs	-	-	-0.21	0.01	23907097
5	-	-	MIR886	PBLs	-	-	-0.25	0.01	23907097
5	-	-	MIR886	PBLs	-	-	-0.24	0.01	23907097
5	-	-	MIR886	PBLs	-	-	-0.28	0.01	23907097
5	-	-	MIR886	PBLs	-	-	-0.2	0.01	23907097
5	-	-	MIR886	PBLs	-	-	-0.2	0.01	23907097
5	-	-	MIR886	PBLs	-	-	-0.21	0.01	23907097
5	-	-	MIR886	PBLs	-	-	-0.27	0.01	23907097
5	-	-	MIR886	PBLs	-	-	-0.28	0.01	23907097
5	-	-	MIR886	PBLs	-	-	-0.23	0.01	23907097
1	-	-	MMEL1	PBLs	-	-	-0.22	0.01	23907097
3	-	-	MRPL3	PBLs	-	-	-0.21	0.01	23907097
9	-	-	MRPL41	PBLs	-	-	-0.2	0.01	23907097
8	-	-	MYOM2	PBLs	-	-	-0.2	0.01	23907097
12	-	-	NCOR2	PBLs	-	-	-0.21	0.01	23907097
2	-	-	NDUFA10	PBLs	-	-	-0.22	0.01	23907097
12	-	-	NEDD1	PBLs	-	-	-0.25	0.01	23907097
14	-	-	NPAS3	PBLs	-	-	-0.22	0.01	23907097
1	-	-	NPHP4	PBLs	-	-	-0.25	0.01	23907097
11	-	-	NTM	PBLs	-	-	-0.22	0.01	23907097
6	-	-	OPRM1	PBLs	-	-	-0.28	0.01	23907097
1	-	-	OR10K1	PBLs	-	-	-0.23	0.01	23907097
6	-	-	OR12D3	PBLs	-	-	-0.28	0.01	23907097
1	-	-	OR14C36	PBLs	-	-	-0.21	0.01	23907097
1	-	-	PCSK9	PBLs	-	-	-0.23	0.01	23907097
19	-	-	PIK3R2	PBLs	-	-	-0.22	0.01	23907097
19	-	-	PPFIA3	PBLs	-	-	-0.21	0.01	23907097
12	-	-	PRR4	PBLs	-	-	-0.21	0.01	23907097
10	-	-	PWWP2B	PBLs	-	-	-0.27	0.01	23907097
12	-	-	PYROXD1	PBLs	-	-	-0.28	0.01	23907097
22	-	-	RAB36	PBLs	-	-	-0.22	0.01	23907097
10	-	-	SH3PXD2A	PBLs	-	-	-0.21	0.01	23907097
20	-	-	SLC17A9	PBLs	-	-	-0.25	0.01	23907097
20	-	-	SLC17A9	PBLs	-	-	-0.27	0.01	23907097
1	-	-	SLC25A24	PBLs	-	-	-0.24	0.01	23907097
6	-	-	SMOC2	PBLs	-	-	-0.25	0.01	23907097
1	-	-	SMYD3	PBLs	-	-	-0.27	0.01	23907097
2	-	-	SPATS2L	PBLs	-	-	-0.26	0.01	23907097
2	-	-	STEAP3	PBLs	-	-	-0.3	0.01	23907097
11	-	-	STT3A	PBLs	-	-	-0.26	0.01	23907097
13	-	-	TMCO3	PBLs	-	-	-0.2	0.01	23907097
9	-	-	TNFSF8	PBLs	-	-	-0.22	0.01	23907097
6	-	-	TRIM26	PBLs	-	-	-0.22	0.01	23907097
6	-	-	TRIM27	PBLs	-	-	-0.22	0.01	23907097
5	-	-	TRIO	PBLs	-	-	-0.2	0.01	23907097
12	-	-	TSPAN9	PBLs	-	-	-0.33	0.01	23907097
2	-	-	TUBA3E	PBLs	-	-	-0.21	0.01	23907097
9	-	-	VAV2	PBLs	-	-	-0.21	0.01	23907097
6	-	-	WDR27	PBLs	-	-	-0.23	0.01	23907097
19	-	-	XAB2	PBLs	-	-	-0.23	0.01	23907097
7	-	-	ZNF117	PBLs	-	-	-0.31	0.01	23907097
17	-	-	AATF	PBLs	-	-	0.24	0.01	23907097
16	-	-	ABCA3	PBLs	-	-	0.29	0.01	23907097
9	-	-	ADAMTS13	PBLs	-	-	0.21	0.01	23907097
2	-	-	AGAP1	PBLs	-	-	0.21	0.01	23907097
4	-	-	AGPAT9	PBLs	-	-	0.21	0.01	23907097
14	-	-	AKAP6	PBLs	-	-	0.29	0.01	23907097
8	-	-	ARHGEF10	PBLs	-	-	0.36	0.01	23907097
2	-	-	ASAP2	PBLs	-	-	0.26	0.01	23907097
17	-	-	ATP2A3	PBLs	-	-	0.26	0.01	23907097
16	-	-	BANP	PBLs	-	-	0.31	0.01	23907097
2	-	-	BCL11A	PBLs	-	-	0.22	0.01	23907097
9	-	-	BICD2	PBLs	-	-	0.3	0.01	23907097
11	-	-	BRSK2	PBLs	-	-	0.2	0.01	23907097
10	-	-	C10orf46	PBLs	-	-	0.24	0.01	23907097
10	-	-	C10orf47	PBLs	-	-	0.24	0.01	23907097
13	-	-	C13orf16	PBLs	-	-	0.21	0.01	23907097
4	-	-	C1QTNF7	PBLs	-	-	0.21	0.01	23907097
17	-	-	CCDC144NL	PBLs	-	-	0.2	0.01	23907097
21	-	-	COL18A1	PBLs	-	-	0.22	0.01	23907097
13	-	-	COL4A2	PBLs	-	-	0.2	0.01	23907097
19	-	-	COL5A3	PBLs	-	-	0.2	0.01	23907097
2	-	-	COL6A3	PBLs	-	-	0.29	0.01	23907097
6	-	-	COQ3	PBLs	-	-	0.26	0.01	23907097
5	-	-	CPLX2	PBLs	-	-	0.22	0.01	23907097
1	-	-	CR1L	PBLs	-	-	0.28	0.01	23907097
2	-	-	CUL3	PBLs	-	-	0.23	0.01	23907097
17	-	-	DNAH9	PBLs	-	-	0.26	0.01	23907097
17	-	-	DUSP3	PBLs	-	-	0.22	0.01	23907097
8	-	-	EPPK1	PBLs	-	-	0.2	0.01	23907097
17	-	-	ERAL1	PBLs	-	-	0.26	0.01	23907097
6	-	-	EYA4	PBLs	-	-	0.21	0.01	23907097
12	-	-	FAM101A	PBLs	-	-	0.25	0.01	23907097
6	-	-	FARS2	PBLs	-	-	0.22	0.01	23907097
4	-	-	FAT1	PBLs	-	-	0.26	0.01	23907097
1	-	-	FCRLA	PBLs	-	-	0.22	0.01	23907097
3	-	-	FHIT	PBLs	-	-	0.29	0.01	23907097
14	-	-	FLJ31306	PBLs	-	-	0.28	0.01	23907097
11	-	-	FLJ32810	PBLs	-	-	0.34	0.01	23907097
10	-	-	FLJ37201	PBLs	-	-	0.29	0.01	23907097
17	-	-	GAA	PBLs	-	-	0.21	0.01	23907097
4	-	-	GABRA2	PBLs	-	-	0.24	0.01	23907097
3	-	-	GAP43	PBLs	-	-	0.24	0.01	23907097
7	-	-	GCK	PBLs	-	-	0.23	0.01	23907097
5	-	-	GFPT2	PBLs	-	-	0.25	0.01	23907097
5	-	-	GFPT2	PBLs	-	-	0.28	0.01	23907097
5	-	-	GFPT2	PBLs	-	-	0.25	0.01	23907097
5	-	-	GFPT2	PBLs	-	-	0.23	0.01	23907097
4	-	-	GPM6A	PBLs	-	-	0.34	0.01	23907097
2	-	-	GREB1	PBLs	-	-	0.22	0.01	23907097
22	-	-	GSTTP1	PBLs	-	-	0.27	0.01	23907097
22	-	-	GSTTP1	PBLs	-	-	0.25	0.01	23907097
22	-	-	GSTTP1	PBLs	-	-	0.26	0.01	23907097
22	-	-	GSTTP2	PBLs	-	-	0.21	0.01	23907097
6	-	-	HCG4P6	PBLs	-	-	0.22	0.01	23907097
6	-	-	HCG4P6	PBLs	-	-	0.27	0.01	23907097
6	-	-	HLA-DPB2	PBLs	-	-	0.24	0.01	23907097
6	-	-	HLA-DPB2	PBLs	-	-	0.3	0.01	23907097
6	-	-	HLA-DPB2	PBLs	-	-	0.26	0.01	23907097
6	-	-	HLA-DQA1	PBLs	-	-	0.22	0.01	23907097
6	-	-	HLA-DQA1	PBLs	-	-	0.22	0.01	23907097
6	-	-	HLA-DQA1	PBLs	-	-	0.25	0.01	23907097
6	-	-	HLA-DQA1	PBLs	-	-	0.47	0.01	23907097
6	-	-	HLA-DQB18	PBLs	-	-	0.2	0.01	23907097
6	-	-	HLA-DRB1	PBLs	-	-	0.39	0.01	23907097
6	-	-	HLA-DRB1	PBLs	-	-	0.23	0.01	23907097
6	-	-	HLA-DRB1	PBLs	-	-	0.25	0.01	23907097
6	-	-	HLA-DRB5	PBLs	-	-	0.35	0.01	23907097
6	-	-	HLA-DRB5	PBLs	-	-	0.27	0.01	23907097
6	-	-	HLA-DRB5	PBLs	-	-	0.21	0.01	23907097
6	-	-	HLA-DRB5	PBLs	-	-	0.22	0.01	23907097
6	-	-	HLA-DRB5	PBLs	-	-	0.23	0.01	23907097
6	-	-	HLA-DRB6	PBLs	-	-	0.23	0.01	23907097
6	-	-	HLA-DRB6	PBLs	-	-	0.38	0.01	23907097
6	-	-	HLA-DRB6	PBLs	-	-	0.23	0.01	23907097
6	-	-	HLA-DRB6	PBLs	-	-	0.28	0.01	23907097
16	-	-	HYDIN	PBLs	-	-	0.23	0.01	23907097
11	-	-	IGSF9B	PBLs	-	-	0.25	0.01	23907097
3	-	-	ITPR1	PBLs	-	-	0.2	0.01	23907097
16	-	-	KCTD5	PBLs	-	-	0.47	0.01	23907097
19	-	-	KLK9	PBLs	-	-	0.23	0.01	23907097
15	-	-	LASS3	PBLs	-	-	0.24	0.01	23907097
15	-	-	LASS3	PBLs	-	-	0.25	0.01	23907097
11	-	-	LOC283267	PBLs	-	-	0.36	0.01	23907097
13	-	-	LRCH1	PBLs	-	-	0.22	0.01	23907097
15	-	-	LRRK1	PBLs	-	-	0.32	0.01	23907097
7	-	-	MAD1L1	PBLs	-	-	0.21	0.01	23907097
11	-	-	MAML2	PBLs	-	-	0.24	0.01	23907097
17	-	-	MAPT	PBLs	-	-	0.28	0.01	23907097
17	-	-	MAPT	PBLs	-	-	0.31	0.01	23907097
14	-	-	MARK3	PBLs	-	-	0.27	0.01	23907097
6	-	-	MLLT4	PBLs	-	-	0.24	0.01	23907097
1	-	-	MMEL1	PBLs	-	-	0.33	0.01	23907097
6	-	-	MOG	PBLs	-	-	0.34	0.01	23907097
4	-	-	MORF4	PBLs	-	-	0.26	0.01	23907097
19	-	-	MRI1	PBLs	-	-	0.28	0.01	23907097
11	-	-	MRPL21	PBLs	-	-	0.22	0.01	23907097
17	-	-	MYADML2	PBLs	-	-	0.28	0.01	23907097
1	-	-	NBPF4	PBLs	-	-	0.21	0.01	23907097
11	-	-	OPCML	PBLs	-	-	0.24	0.01	23907097
1	-	-	OPRD1	PBLs	-	-	0.28	0.01	23907097
6	-	-	OR12D3	PBLs	-	-	0.21	0.01	23907097
1	-	-	OSBPL9	PBLs	-	-	0.22	0.01	23907097
12	-	-	PDZRN4	PBLs	-	-	0.22	0.01	23907097
3	-	-	PLD1	PBLs	-	-	0.26	0.01	23907097
1	-	-	PMF1	PBLs	-	-	0.21	0.01	23907097
13	-	-	PRHOXNB	PBLs	-	-	0.3	0.01	23907097
17	-	-	PRKCA	PBLs	-	-	0.24	0.01	23907097
16	-	-	PRM1	PBLs	-	-	0.25	0.01	23907097
10	-	-	PTPN20B	PBLs	-	-	0.22	0.01	23907097
8	-	-	PVT1	PBLs	-	-	0.29	0.01	23907097
13	-	-	RASA3	PBLs	-	-	0.25	0.01	23907097
6	-	-	RNF39	PBLs	-	-	0.23	0.01	23907097
17	-	-	RPH3AL	PBLs	-	-	0.2	0.01	23907097
1	-	-	S100A14	PBLs	-	-	0.21	0.01	23907097
7	-	-	SDK1	PBLs	-	-	0.21	0.01	23907097
14	-	-	SERPINA9	PBLs	-	-	0.2	0.01	23907097
20	-	-	SLC12A5	PBLs	-	-	0.32	0.01	23907097
5	-	-	SLC6A3	PBLs	-	-	0.22	0.01	23907097
22	-	-	SMC1B	PBLs	-	-	0.29	0.01	23907097
2	-	-	STK25	PBLs	-	-	0.2	0.01	23907097
4	-	-	STK32B	PBLs	-	-	0.23	0.01	23907097
1	-	-	TMEM9	PBLs	-	-	0.25	0.01	23907097
6	-	-	TNXB	PBLs	-	-	0.24	0.01	23907097
6	-	-	TNXB	PBLs	-	-	0.22	0.01	23907097
6	-	-	TNXB	PBLs	-	-	0.22	0.01	23907097
20	-	-	TOX2	PBLs	-	-	0.27	0.01	23907097
7	-	-	TPK1	PBLs	-	-	0.26	0.01	23907097
6	-	-	TRIM10	PBLs	-	-	0.4	0.01	23907097
6	-	-	TRIM31	PBLs	-	-	0.22	0.01	23907097
4	-	-	TRIML2	PBLs	-	-	0.23	0.01	23907097
16	-	-	USP7	PBLs	-	-	0.23	0.01	23907097
6	-	-	UST	PBLs	-	-	0.27	0.01	23907097
9	-	-	VAV2	PBLs	-	-	0.43	0.01	23907097
14	-	-	VSX2	PBLs	-	-	0.26	0.01	23907097
11	-	-	YAP1	PBLs	-	-	0.25	0.01	23907097
7	-	-	ZNF783	PBLs	-	-	0.23	0.01	23907097
3	45505334	45505334	LARS2	blood	-	-	-0.3	8.34e-11	28851441
12	123431865	123431865	ABCB9	blood	-	-	-0.28	4.33e-10	28851441
1	9716019	9716019	C1orf200	blood	-	-	-0.28	7.47e-10	28851441
1	211779938	211779938	-	blood	-	-	-0.28	1.23e-09	28851441
2	65861662	65861662	-	blood	-	-	0.28	1.25e-09	28851441
19	16392219	16392219	-	blood	-	-	-0.28	1.4e-09	28851441
3	194826585	194826585	C3orf21	blood	-	-	-0.27	2.64e-09	28851441
1	25291905	25291905	RUNX3	blood	-	-	0.27	3.59e-09	28851441
18	21452844	21452844	LAMA3	blood	-	-	0.27	3.64e-09	28851441
1	167487295	167487295	CD247	blood	-	-	0.27	4.69e-09	28851441
19	827776	827776	AZU1	blood	-	-	-0.27	4.96e-09	28851441
1	226036279	226036279	TMEM63A	blood	-	-	0.27	5.21e-09	28851441
12	54806218	54806218	ITGA5	blood	-	-	-0.26	6.99e-09	28851441
19	827843	827843	AZU1	blood	-	-	-0.26	7.37e-09	28851441
17	80084751	80084751	CCDC57	blood	-	-	0.26	8.11e-09	28851441
1	16483658	16483658	EPHA2	blood	-	-	-0.26	8.17e-09	28851441
18	74257894	74257894	LOC284276	blood	-	-	-0.26	8.95e-09	28851441
4	10101553	10101553	WDR1	blood	-	-	0.26	1.38e-08	28851441
20	56247302	56247302	PMEPA1	blood	-	-	-0.26	1.4e-08	28851441
11	121349740	121349740	SORL1	blood	-	-	-0.26	1.46e-08	28851441
19	35630388	35630388	FXYD1	blood	-	-	-0.26	1.53e-08	28851441
2	70368457	70368457	-	blood	-	-	-0.26	1.66e-08	28851441
11	63274030	63274030	LGALS12	blood	-	-	-0.26	1.79e-08	28851441
2	88357920	88357920	-	blood	-	-	0.26	1.81e-08	28851441
8	67841925	67841925	-	blood	-	-	-0.26	2.2e-08	28851441
17	38504102	38504102	RARA	blood	-	-	-0.26	2.27e-08	28851441
19	2529022	2529022	GNG7	blood	-	-	-0.26	2.32e-08	28851441
4	48136234	48136234	TXK	blood	-	-	0.26	2.44e-08	28851441
17	38171530	38171530	CSF3	blood	-	-	-0.25	2.79e-08	28851441
13	99668433	99668433	DOCK9	blood	-	-	0.25	2.96e-08	28851441
1	203156625	203156625	CHI3L1	blood	-	-	-0.25	3.05e-08	28851441
15	101777761	101777761	CHSY1	blood	-	-	-0.25	3.31e-08	28851441
X	153770418	153770418	IKBKG	blood	-	-	-0.25	3.35e-08	28851441
10	126329354	126329354	FAM53B	blood	-	-	-0.25	3.37e-08	28851441
7	4752983	4752983	FOXK1	blood	-	-	-0.25	3.5e-08	28851441
10	103574626	103574626	MGEA5	blood	-	-	0.25	3.55e-08	28851441
3	184050393	184050393	EIF4G1	blood	-	-	-0.25	3.83e-08	28851441
17	77753199	77753199	CBX2	blood	-	-	-0.25	3.89e-08	28851441
14	93539613	93539613	ITPK1	blood	-	-	-0.25	3.97e-08	28851441
4	48136452	48136452	TXK	blood	-	-	0.25	4.02e-08	28851441
19	19305340	19305340	RFXANK	blood	-	-	-0.25	4.1e-08	28851441
11	10476976	10476976	AMPD3	blood	-	-	-0.25	4.15e-08	28851441
7	75582881	75582881	POR	blood	-	-	-0.25	4.16e-08	28851441
11	72868833	72868833	-	blood	-	-	-0.25	4.42e-08	28851441
16	85558148	85558148	-	blood	-	-	-0.25	4.49e-08	28851441
15	90543224	90543224	-	blood	-	-	-0.25	4.68e-08	28851441
2	68592345	68592345	PLEK	blood	-	-	-0.25	4.86e-08	28851441
17	25659609	25659609	-	blood	-	-	-0.25	4.9e-08	28851441
2	68592349	68592349	PLEK	blood	-	-	-0.25	4.93e-08	28851441
9	139459307	139459307	-	blood	-	-	-0.25	5.07e-08	28851441
13	50696070	50696070	DLEU2	blood	-	-	-0.25	5.09e-08	28851441
12	109538736	109538736	UNG	blood	-	-	-0.25	5.17e-08	28851441
13	111318490	111318490	CARS2	blood	-	-	-0.25	5.34e-08	28851441
14	55569959	55569959	-	blood	-	-	-0.25	5.36e-08	28851441
1	23590501	23590501	-	blood	-	-	-0.25	5.38e-08	28851441
4	41983716	41983716	DCAF4L1	blood	-	-	-0.25	5.54e-08	28851441
14	61801201	61801201	PRKCH	blood	-	-	0.25	5.92e-08	28851441
12	9822287	9822287	CLEC2D	blood	-	-	0.25	5.93e-08	28851441
5	141346431	141346431	RNF14	blood	-	-	-0.25	5.99e-08	28851441
15	64442561	64442561	SNX22	blood	-	-	-0.25	6.84e-08	28851441
1	9819767	9819767	CLSTN1	blood	-	-	-0.25	7.17e-08	28851441
5	180116385	180116385	-	blood	-	-	0.25	7.2e-08	28851441
12	56329615	56329615	DGKA	blood	-	-	0.25	7.38e-08	28851441
1	193075249	193075249	GLRX2	blood	-	-	-0.25	7.41e-08	28851441
15	64442578	64442578	SNX22	blood	-	-	-0.25	7.46e-08	28851441
11	1785701	1785701	CTSD	blood	-	-	-0.25	7.47e-08	28851441
1	11722935	11722935	FBXO6	blood	-	-	-0.25	7.51e-08	28851441
11	47471400	47471400	RAPSN	blood	-	-	-0.25	7.96e-08	28851441
11	119177430	119177430	CBL	blood	-	-	0.25	8.2e-08	28851441
4	56718320	56718320	EXOC1	blood	-	-	0.25	8.54e-08	28851441
7	50774217	50774217	GRB10	blood	-	-	-0.25	8.62e-08	28851441
6	35771838	35771838	LHFPL5	blood	-	-	-0.25	8.66e-08	28851441
10	31182298	31182298	ZNF438	blood	-	-	-0.25	8.76e-08	28851441
17	33568791	33568791	SLFN5	blood	-	-	0.24	8.89e-08	28851441
19	36399346	36399346	TYROBP	blood	-	-	-0.24	9.02e-08	28851441
1	92953279	92953279	GFI1	blood	-	-	-0.24	9.27e-08	28851441
2	47404636	47404636	CALM2	blood	-	-	-0.24	9.33e-08	28851441
1	54693933	54693933	SSBP3	blood	-	-	-0.24	9.47e-08	28851441
3	194696866	194696866	-	blood	-	-	-0.24	9.62e-08	28851441
17	33775961	33775961	SLFN13	blood	-	-	-0.24	9.72e-08	28851441
1	567312	567312	MIR1977	blood	-	-	-0.24	9.74e-08	28851441
9	15371248	15371248	-	blood	-	-	-0.24	9.95e-08	28851441
2	27616316	27616316	FTHL3	saliva	-	-	-0.35	1.05e-08	28851441
21	44869762	44869762	C21orf125	saliva	-	-	-0.33	3.45e-08	28851441
6	33973531	33973531	-	saliva	-	-	-0.33	6.92e-08	28851441
11	61734830	61734830	FTH1	saliva	-	-	-0.33	7.15e-08	28851441
1	203146346	203146346	MYBPH	saliva	-	-	-0.32	9.1e-08	28851441
	1562568	1562617	FOXC1	cerebral cortex tissue	-	-	-0.51	-	27692691
	22966265	22966265	SSTR4	cerebral cortex tissue	-	-	-0.47	-	27692691
	102750863	102751004	TCEAL3	cerebral cortex tissue	-	-	-0.42	-	27692691
	20294409	20294425	INSM1	cerebral cortex tissue	-	-	-0.4	-	27692691
	67494977	67494989	KIF23	cerebral cortex tissue	-	-	-0.39	-	27692691
	32061086	32061086	APRIN	cerebral cortex tissue	-	-	-0.39	-	27692691
	203447859	203447883	RIPK5	cerebral cortex tissue	-	-	-0.39	-	27692691
	33315853	33315995	OLIG2	cerebral cortex tissue	-	-	-0.36	-	27692691
	76861085	76861085	PAK1	cerebral cortex tissue	-	-	-0.36	-	27692691
	81954504	81954527	ANXA11	cerebral cortex tissue	-	-	-0.33	-	27692691
	149092391	149092434	PPARGC1B	cerebral cortex tissue	-	-	-0.32	-	27692691
	176171570	176171570	UNC5A	cerebral cortex tissue	-	-	-0.32	-	27692691
	26341073	26341079	HIST1H4F	cerebral cortex tissue	-	-	-0.31	-	27692691
	303754	303754	IFITM1	cerebral cortex tissue	-	-	-0.31	-	27692691
	56332879	56332879	OTX2	cerebral cortex tissue	-	-	-0.31	-	27692691
	51681178	51681312	TEX264	cerebral cortex tissue	-	-	-0.3	-	27692691
	124543257	124543259	PKNOX2	cerebral cortex tissue	-	-	-0.29	-	27692691
	69662244	69662262	ATOH7	cerebral cortex tissue	-	-	-0.29	-	27692691
	160467855	160467855	LY75	cerebral cortex tissue	-	-	-0.28	-	27692691
	119714137	119714150	ARHGEF12	cerebral cortex tissue	-	-	-0.28	-	27692691
	124541332	124541332	SPRY1	cerebral cortex tissue	-	-	-0.28	-	27692691
	43964758	43965013	PDXK	cerebral cortex tissue	-	-	-0.27	-	27692691
	116285841	116285841	NOS1	cerebral cortex tissue	-	-	-0.27	-	27692691
	97750451	97750476	BRI3	cerebral cortex tissue	-	-	-0.27	-	27692691
	119286711	119286711	EMX2	cerebral cortex tissue	-	-	-0.27	-	27692691
	9436578	9436588	C20orf103	cerebral cortex tissue	-	-	-0.27	-	27692691
	46324870	46324870	DGKZ	cerebral cortex tissue	-	-	-0.26	-	27692691
	38879341	38879351	PLEKHA2	cerebral cortex tissue	-	-	-0.26	-	27692691
	89218232	89218232	FURIN	cerebral cortex tissue	-	-	-0.26	-	27692691
	38766036	38766036	TACC1	cerebral cortex tissue	-	-	-0.25	-	27692691
	49920154	49920325	DAZAP2	cerebral cortex tissue	-	-	-0.24	-	27692691
	171283339	171283339	SP5	cerebral cortex tissue	-	-	-0.24	-	27692691
	81563866	81563866	ZBTB10	cerebral cortex tissue	-	-	-0.23	-	27692691
	73516684	73516702	SPOCK2	cerebral cortex tissue	-	-	-0.23	-	27692691
	19176194	19176194	PLEKHA5	cerebral cortex tissue	-	-	-0.23	-	27692691
	113649369	113649549	NEUROG2	cerebral cortex tissue	-	-	-0.22	-	27692691
	51899392	51899392	RARG	cerebral cortex tissue	-	-	-0.22	-	27692691
	86196663	86196682	JPH3	cerebral cortex tissue	-	-	-0.22	-	27692691
	104453872	104453875	CTHRC1	cerebral cortex tissue	-	-	-0.22	-	27692691
	54424603	54424619	GDF11	cerebral cortex tissue	-	-	-0.21	-	27692691
	183290582	183290582	DNAJC10	cerebral cortex tissue	-	-	-0.21	-	27692691
	166520613	166520613	CPE	cerebral cortex tissue	-	-	-0.21	-	27692691
	3814562	3814562	LRRN1	cerebral cortex tissue	-	-	-0.21	-	27692691
	7899384	7899387	CTXN1	cerebral cortex tissue	-	-	-0.21	-	27692691
	67838082	67838082	LRP5	cerebral cortex tissue	-	-	-0.2	-	27692691
	103523508	103523520	NPM3	cerebral cortex tissue	-	-	-0.2	-	27692691
	46324870	46324920	DGKZ	cerebral cortex tissue	-	-	-0.2	-	27692691
	1285145	1285145	TOLLIP	cerebral cortex tissue	-	-	-0.2	-	27692691
	61617468	61617468	CCDC46	cerebral cortex tissue	-	-	-0.2	-	27692691
	10604763	10604763	PTPRD	cerebral cortex tissue	-	-	-0.2	-	27692691
	125812308	125812357	LHX2	cerebral cortex tissue	-	-	-0.2	-	27692691
	7990565	7990575	AFAP1	cerebral cortex tissue	-	-	-0.2	-	27692691
	2985059	2985078	PRDM16	cerebral cortex tissue	-	-	-0.2	-	27692691
	196643415	196643415	CENTB2	cerebral cortex tissue	-	-	-0.19	-	27692691
	2785867	2785867	SERPINB1	cerebral cortex tissue	-	-	-0.19	-	27692691
	53366557	53366557	LIG1	cerebral cortex tissue	-	-	-0.19	-	27692691
	61728301	61728327	PRKCA	cerebral cortex tissue	-	-	-0.19	-	27692691
	135690685	135690685	ARHGEF6	cerebral cortex tissue	-	-	-0.19	-	27692691
	154219930	154219930	C5orf4	cerebral cortex tissue	-	-	-0.19	-	27692691
	30760885	30760885	KIAA1949	cerebral cortex tissue	-	-	-0.19	-	27692691
	72301085	72301093	ZNF516	cerebral cortex tissue	-	-	-0.18	-	27692691
	40718704	40718715	PTGER4	cerebral cortex tissue	-	-	-0.18	-	27692691
	26299623	26299623	BNIP3L	cerebral cortex tissue	-	-	-0.18	-	27692691
	176448903	176448903	FGFR4	cerebral cortex tissue	-	-	-0.18	-	27692691
	4916645	4916656	MSX1	cerebral cortex tissue	-	-	-0.18	-	27692691
	40325801	40325856	FLJ20273	cerebral cortex tissue	-	-	-0.17	-	27692691
	177316523	177316533	TOR3A	cerebral cortex tissue	-	-	-0.17	-	27692691
	119908793	119908793	TMEM37	cerebral cortex tissue	-	-	-0.17	-	27692691
	87125910	87125926	SLITRK5	cerebral cortex tissue	-	-	-0.17	-	27692691
	31391795	31391795	RYR3	cerebral cortex tissue	-	-	-0.17	-	27692691
	178395067	178395234	TBL1XR1	cerebral cortex tissue	-	-	-0.17	-	27692691
	43153629	43153629	PTK7	cerebral cortex tissue	-	-	-0.17	-	27692691
	82517333	82517463	FAM46A	cerebral cortex tissue	-	-	-0.17	-	27692691
	58171672	58171698	DACT1	cerebral cortex tissue	-	-	-0.17	-	27692691
	75969519	75969519	COL12A1	cerebral cortex tissue	-	-	-0.17	-	27692691
	160599760	160599766	SLC22A2	cerebral cortex tissue	-	-	-0.17	-	27692691
	114703695	114703695	TCF7L2	cerebral cortex tissue	-	-	-0.16	-	27692691
	138022017	138022017	TMEM22	cerebral cortex tissue	-	-	-0.16	-	27692691
	144310393	144310449	LY6H	cerebral cortex tissue	-	-	-0.16	-	27692691
	156887950	156887950	NR4A2	cerebral cortex tissue	-	-	-0.16	-	27692691
	18492052	18492069	ELL	cerebral cortex tissue	-	-	-0.16	-	27692691
	50658436	50658436	DMRTA2	cerebral cortex tissue	-	-	-0.16	-	27692691
	31797002	31797014	PAX6	cerebral cortex tissue	-	-	-0.16	-	27692691
	70438186	70438186	ITGB1BP2	cerebral cortex tissue	-	-	-0.16	-	27692691
	115024839	115024839	FKBP15	cerebral cortex tissue	-	-	-0.16	-	27692691
	202386812	202386823	ETNK2	cerebral cortex tissue	-	-	-0.16	-	27692691
	145445602	145445602	CNTNAP2	cerebral cortex tissue	-	-	-0.16	-	27692691
	57019842	57019857	TUBB1	cerebral cortex tissue	-	-	-0.16	-	27692691
	183438808	183438949	FRZB	cerebral cortex tissue	-	-	-0.16	-	27692691
	227367298	227367423	IRS1	cerebral cortex tissue	-	-	-0.16	-	27692691
	108306946	108306946	VAV3	cerebral cortex tissue	-	-	-0.16	-	27692691
	57931998	57931998	UNQ9438	cerebral cortex tissue	-	-	-0.15	-	27692691
	27390763	27390763	PDX1	cerebral cortex tissue	-	-	-0.15	-	27692691
	92299726	92299726	CDK6	cerebral cortex tissue	-	-	-0.15	-	27692691
	22363958	22363958	RAPGEF5	cerebral cortex tissue	-	-	-0.15	-	27692691
	923578	923627	AP2A2	cerebral cortex tissue	-	-	-0.15	-	27692691
	72149376	72149495	TNPO1	cerebral cortex tissue	-	-	-0.15	-	27692691
	28460673	28460686	SESN2	cerebral cortex tissue	-	-	-0.15	-	27692691
	2727475	2727475	CPXM	cerebral cortex tissue	-	-	-0.15	-	27692691
	204876546	204876546	DYRK3	cerebral cortex tissue	-	-	-0.15	-	27692691
	70563013	70563019	LMBRD1	cerebral cortex tissue	-	-	-0.15	-	27692691
	72950183	72950183	SCAMP2	cerebral cortex tissue	-	-	-0.15	-	27692691
	61965601	61965697	TPD52L2	cerebral cortex tissue	-	-	-0.15	-	27692691
	68674965	68675309	SSTR2	cerebral cortex tissue	-	-	-0.15	-	27692691
	36439716	36439716	CRIM1	cerebral cortex tissue	-	-	-0.15	-	27692691
	75302791	75303182	CAMK2G	cerebral cortex tissue	-	-	-0.14	-	27692691
	27732369	27732445	EOMES	cerebral cortex tissue	-	-	-0.14	-	27692691
	52706999	52706999	NAPA	cerebral cortex tissue	-	-	-0.14	-	27692691
	63798018	63798018	SLC16A6	cerebral cortex tissue	-	-	-0.14	-	27692691
	60439944	60439944	TMEM132A	cerebral cortex tissue	-	-	-0.14	-	27692691
	31119867	31119867	PYCARD	cerebral cortex tissue	-	-	-0.14	-	27692691
	19422757	19422863	OSR1	cerebral cortex tissue	-	-	-0.14	-	27692691
	136361312	136361314	RXRA	cerebral cortex tissue	-	-	-0.14	-	27692691
	71909313	71909332	KIAA1274	cerebral cortex tissue	-	-	-0.14	-	27692691
	92294470	92294487	NUDT4	cerebral cortex tissue	-	-	-0.14	-	27692691
	16528470	16528584	RAFTLIN	cerebral cortex tissue	-	-	-0.14	-	27692691
	110553714	110553714	KCNC4	cerebral cortex tissue	-	-	-0.14	-	27692691
	166360365	166360365	GALNT3	cerebral cortex tissue	-	-	-0.14	-	27692691
	31894606	31894620	HSPA1L	cerebral cortex tissue	-	-	-0.14	-	27692691
	163593078	163593078	LMX1A	cerebral cortex tissue	-	-	-0.13	-	27692691
	110320325	110320325	NPHP1	cerebral cortex tissue	-	-	-0.13	-	27692691
	212220707	212220707	PROX1	cerebral cortex tissue	-	-	-0.13	-	27692691
	153557012	153557100	RUSC1	cerebral cortex tissue	-	-	-0.13	-	27692691
	31343108	31343179	NEUROD6	cerebral cortex tissue	-	-	-0.13	-	27692691
	9637324	9637346	PIK3CD	cerebral cortex tissue	-	-	-0.13	-	27692691
	34964208	34964231	LOC145845	cerebral cortex tissue	-	-	-0.13	-	27692691
	125850802	125850864	ANKRD50	cerebral cortex tissue	-	-	-0.13	-	27692691
	27348179	27348179	NDNL2	cerebral cortex tissue	-	-	-0.13	-	27692691
	12603280	12603280	DHRS3	cerebral cortex tissue	-	-	-0.13	-	27692691
	8862125	8862451	ENO1	cerebral cortex tissue	-	-	-0.13	-	27692691
	154934711	154934711	SFRP2	cerebral cortex tissue	-	-	-0.13	-	27692691
	90946181	90946188	BARHL2	cerebral cortex tissue	-	-	-0.13	-	27692691
	40661696	40661696	LRFN2	cerebral cortex tissue	-	-	-0.13	-	27692691
	17715060	17715060	KCNC1	cerebral cortex tissue	-	-	-0.13	-	27692691
	60071114	60071114	TAF4	cerebral cortex tissue	-	-	-0.13	-	27692691
	15198215	15198232	ASB9	cerebral cortex tissue	-	-	-0.12	-	27692691
	79403036	79403036	STARD5	cerebral cortex tissue	-	-	-0.12	-	27692691
	851200	851298	TIMM22	cerebral cortex tissue	-	-	-0.12	-	27692691
	37658945	37658945	THBS1	cerebral cortex tissue	-	-	-0.12	-	27692691
	216007268	216007286	FN1	cerebral cortex tissue	-	-	-0.12	-	27692691
	234295931	234295964	NID1	cerebral cortex tissue	-	-	-0.12	-	27692691
	87453807	87453807	LOC390748	cerebral cortex tissue	-	-	-0.12	-	27692691
	172685067	172685496	STC2	cerebral cortex tissue	-	-	-0.12	-	27692691
	1807217	1807217	REXO1	cerebral cortex tissue	-	-	-0.12	-	27692691
	30765125	30765125	MAP3K8	cerebral cortex tissue	-	-	-0.12	-	27692691
	174678490	174678833	HAND2	cerebral cortex tissue	-	-	-0.12	-	27692691
	1154699	1154699	STK11	cerebral cortex tissue	-	-	-0.12	-	27692691
	29996984	29997350	KCNA4	cerebral cortex tissue	-	-	-0.12	-	27692691
	126314848	126314848	NR5A1	cerebral cortex tissue	-	-	-0.12	-	27692691
	70308910	70308910	PKM2	cerebral cortex tissue	-	-	-0.12	-	27692691
	64870140	64870154	IRAK3	cerebral cortex tissue	-	-	-0.12	-	27692691
	120550894	120550894	FLJ14466	cerebral cortex tissue	-	-	-0.12	-	27692691
	88508187	88508187	BMPR1A	cerebral cortex tissue	-	-	-0.12	-	27692691
	41289624	41289624	SFRP1	cerebral cortex tissue	-	-	-0.12	-	27692691
	73954953	73954994	GDA	cerebral cortex tissue	-	-	-0.12	-	27692691
	31026632	31026632	MYST1	cerebral cortex tissue	-	-	-0.12	-	27692691
	62168009	62168009	TCEA2	cerebral cortex tissue	-	-	-0.12	-	27692691
	30363471	30363809	RBPMS	cerebral cortex tissue	-	-	-0.11	-	27692691
	43077444	43077444	LOC389289	cerebral cortex tissue	-	-	-0.11	-	27692691
	216587709	216587742	TGFB2	cerebral cortex tissue	-	-	-0.11	-	27692691
	961101	961101	ABR	cerebral cortex tissue	-	-	-0.11	-	27692691
	126518435	126518489	TRIB1	cerebral cortex tissue	-	-	-0.11	-	27692691
	71437669	71437669	CALN1	cerebral cortex tissue	-	-	-0.11	-	27692691
	1094193	1094554	GPR30	cerebral cortex tissue	-	-	-0.11	-	27692691
	90446932	90446985	GRIN3	cerebral cortex tissue	-	-	-0.11	-	27692691
	122974618	122974692	PKIB	cerebral cortex tissue	-	-	-0.11	-	27692691
	94983829	94984036	GPR150	cerebral cortex tissue	-	-	-0.11	-	27692691
	103541610	103541610	PDGFD	cerebral cortex tissue	-	-	-0.11	-	27692691
	91395779	91395779	PANK1	cerebral cortex tissue	-	-	-0.11	-	27692691
	3834087	3834091	STIM1	cerebral cortex tissue	-	-	-0.11	-	27692691
	86686130	86686325	C7orf23	cerebral cortex tissue	-	-	-0.11	-	27692691
	99651138	99651138	FOXE1	cerebral cortex tissue	-	-	-0.11	-	27692691
	21706842	21706842	SOX4	cerebral cortex tissue	-	-	-0.11	-	27692691
	127131761	127132180	GYPC	cerebral cortex tissue	-	-	-0.11	-	27692691
	53820273	53820273	PRTG	cerebral cortex tissue	-	-	-0.11	-	27692691
	6488903	6488903	KDELR2	cerebral cortex tissue	-	-	-0.11	-	27692691
	85973290	85973399	MAP1LC3B	cerebral cortex tissue	-	-	-0.11	-	27692691
	116164900	116164900	APOA5	cerebral cortex tissue	-	-	-0.11	-	27692691
	78091981	78092004	44085	cerebral cortex tissue	-	-	-0.1	-	27692691
	62275622	62275628	B3GNT2	cerebral cortex tissue	-	-	-0.1	-	27692691
	135542966	135542966	MYB	cerebral cortex tissue	-	-	-0.1	-	27692691
	61565279	61565412	KCNQ2	cerebral cortex tissue	-	-	-0.1	-	27692691
	22291862	22291872	CDR2	cerebral cortex tissue	-	-	-0.1	-	27692691
	89872701	89872701	LRRC8C	cerebral cortex tissue	-	-	-0.1	-	27692691
	79079089	79079166	MESDC1	cerebral cortex tissue	-	-	-0.1	-	27692691
	180650208	180650461	GNB4	cerebral cortex tissue	-	-	-0.1	-	27692691
	30815369	30815473	DNMT3B	cerebral cortex tissue	-	-	-0.1	-	27692691
	112854572	112854572	PROZ	cerebral cortex tissue	-	-	-0.1	-	27692691
	121741599	121741599	LOC389549	cerebral cortex tissue	-	-	-0.1	-	27692691
	22912008	22912008	EPHB2	cerebral cortex tissue	-	-	-0.1	-	27692691
	94816787	94816874	CYP26A1	cerebral cortex tissue	-	-	-0.1	-	27692691
	4998572	4998572	BHLHB2	cerebral cortex tissue	-	-	-0.1	-	27692691
	131734229	131734240	SLC22A5	cerebral cortex tissue	-	-	-0.09	-	27692691
	1093901	1093901	WDR37	cerebral cortex tissue	-	-	-0.09	-	27692691
	6978621	6978643	RNF144A	cerebral cortex tissue	-	-	-0.09	-	27692691
	73182312	73182312	C14orf168	cerebral cortex tissue	-	-	-0.09	-	27692691
	19214520	19214529	SH2D4A	cerebral cortex tissue	-	-	-0.09	-	27692691
	33388282	33388282	ZNF297	cerebral cortex tissue	-	-	-0.09	-	27692691
	7051475	7051475	RREB1	cerebral cortex tissue	-	-	-0.09	-	27692691
	37679567	37679567	STAT5B	cerebral cortex tissue	-	-	-0.09	-	27692691
	113604770	113604770	TBX3	cerebral cortex tissue	-	-	-0.09	-	27692691
	199567	199567	RPH3AL	cerebral cortex tissue	-	-	-0.09	-	27692691
	66812361	66812417	ANKRD13D	cerebral cortex tissue	-	-	-0.09	-	27692691
	43859996	43860081	ALKBH3	cerebral cortex tissue	-	-	-0.09	-	27692691
	156933820	156933879	ADAM19	cerebral cortex tissue	-	-	-0.09	-	27692691
	190152839	190152881	SLC40A1	cerebral cortex tissue	-	-	-0.09	-	27692691
	4585316	4585316	TRIM68	cerebral cortex tissue	-	-	-0.09	-	27692691
	64042545	64042545	ZBTB1	cerebral cortex tissue	-	-	-0.09	-	27692691
	52690192	52690210	DDHD1	cerebral cortex tissue	-	-	-0.09	-	27692691
	48244709	48245151	CEBPB	cerebral cortex tissue	-	-	-0.09	-	27692691
	140361745	140361745	MRPS33	cerebral cortex tissue	-	-	-0.09	-	27692691
	24870831	24870831	NEFL	cerebral cortex tissue	-	-	-0.08	-	27692691
	43158825	43158886	KCNS1	cerebral cortex tissue	-	-	-0.08	-	27692691
	54437512	54437549	GCH1	cerebral cortex tissue	-	-	-0.08	-	27692691
	13943609	13943609	SPON1	cerebral cortex tissue	-	-	-0.08	-	27692691
	58352247	58352254	ZNF347	cerebral cortex tissue	-	-	-0.07	-	27692691
	1163677	1163749	SLC12A7	cerebral cortex tissue	-	-	-0.07	-	27692691
	156500216	156500234	HLXB9	cerebral cortex tissue	-	-	-0.07	-	27692691
	98910316	98910316	MGC42367	cerebral cortex tissue	-	-	-0.07	-	27692691
	81410670	81410730	HOMER2	cerebral cortex tissue	-	-	-0.07	-	27692691
	9110323	9110370	GPR157	cerebral cortex tissue	-	-	-0.07	-	27692691
	37564428	37564460	FBXO10	cerebral cortex tissue	-	-	-0.07	-	27692691
	36124463	36124465	NKX2-8	cerebral cortex tissue	-	-	-0.07	-	27692691
	47043810	47043819	SHC4	cerebral cortex tissue	-	-	-0.07	-	27692691
	234626318	234626318	EDARADD	cerebral cortex tissue	-	-	-0.07	-	27692691
	46040166	46040166	XCR1	cerebral cortex tissue	-	-	-0.07	-	27692691
	28314320	28314351	FOXG1B	cerebral cortex tissue	-	-	-0.07	-	27692691
	39462147	39462154	DAB2	cerebral cortex tissue	-	-	-0.06	-	27692691
	50352481	50352687	ZMYND10	cerebral cortex tissue	-	-	-0.06	-	27692691
	63293102	63293102	RASSF3	cerebral cortex tissue	-	-	-0.05	-	27692691
	86540294	86540297	BANP	cerebral cortex tissue	-	-	-0.04	-	27692691
	32926020	32926343	GGTL3	cerebral cortex tissue	-	-	0.1	-	27692691
	55509981	55510157	ABC1	cerebral cortex tissue	-	-	0.11	-	27692691
	32926216	32926343	ACSS2	cerebral cortex tissue	-	-	0.13	-	27692691
	55917734	55917877	LOC56901	cerebral cortex tissue	-	-	0.41	-	27692691
19	50595864	50595864		blood	-	-	1.57	1.09e-20	27853465
1	148864870	148864870		blood	-	-	1.31	1.64e-15	27853465
8	7469535	7469535		blood	-	-	-1.21	1.38e-13	27853465
5	2151560	2151560		blood	-	-	1.21	2.24e-13	27853465
6	161066486	161066486		blood	-	-	1.28	4.23e-13	27853465
6	153451650	153451650		blood	-	-	1.18	1.32e-12	27853465
9	45413153	45413153		blood	-	-	-1.11	6.13e-12	27853465
17	79876105	79876105		blood	-	-	1.11	1.01e-11	27853465
8	29207347	29207347		blood	-	-	-1.13	1.21e-11	27853465
13	28499045	28499045		blood	-	-	1.12	1.39e-11	27853465
17	27071641	27071641		blood	-	-	-1.09	2.1e-11	27853465
8	11538630	11538630		blood	-	-	1.11	2.18e-11	27853465
7	102330910	102330910		blood	-	-	-1.11	2.52e-11	27853465
3	125648119	125648119		blood	-	-	-1.11	2.57e-11	27853465
10	48186138	48186138		blood	-	-	1.08	2.78e-11	27853465
13	45992725	45992725		blood	-	-	1.1	3.48e-11	27853465
2	180871406	180871406		blood	-	-	-1.12	3.55e-11	27853465
2	109834011	109834011		blood	-	-	1.08	3.84e-11	27853465
19	33167362	33167362		blood	-	-	1.11	4.1e-11	27853465
4	13536107	13536107		blood	-	-	-1.1	4.62e-11	27853465
13	57715641	57715641		blood	-	-	1.08	4.62e-11	27853465
13	21872770	21872770		blood	-	-	-1.09	5.44e-11	27853465
19	50595864	50595864		blood	-	-	-2.13	6.24e-11	27853465
12	130662189	130662189		blood	-	-	1.08	6.25e-11	27853465
9	138980742	138980742		blood	-	-	1.07	8.44e-11	27853465
2	152954469	152954469		blood	-	-	1.08	1.02e-10	27853465
3	62364171	62364171		blood	-	-	1.05	1.26e-10	27853465
8	49468828	49468828		blood	-	-	-1.08	1.66e-10	27853465
1	234950494	234950494		blood	-	-	1.06	2.06e-10	27853465
10	30723853	30723853		blood	-	-	-1.07	2.12e-10	27853465
20	40246428	40246428		blood	-	-	1.04	2.19e-10	27853465
20	37357841	37357841		blood	-	-	-1.06	2.5e-10	27853465
3	147129204	147129204		blood	-	-	1.04	2.67e-10	27853465
4	134072763	134072763		blood	-	-	1.06	2.94e-10	27853465
20	62588163	62588163		blood	-	-	1.03	3.58e-10	27853465
5	72861609	72861609		blood	-	-	-1.03	4.06e-10	27853465
7	72494504	72494504		blood	-	-	-1.01	4.57e-10	27853465
17	29728	29728		blood	-	-	-1.02	4.6e-10	27853465
7	99149631	99149631		blood	-	-	1.02	4.99e-10	27853465
10	90751531	90751531		blood	-	-	1.04	5.15e-10	27853465
22	24627294	24627294		blood	-	-	-0.28384	1.28e-08	30871403
12	25801621	25801621	IFLTD1	blood	-	-	-0.38619	1.54e-08	30871403
12	133003928	133003928		blood	-	-	-0.4967	1.55e-08	30871403
10	2173024	2173024		blood	-	-	0.31875	1.31e-07	30871403
13	48892244	48892244	RB1	blood	-	-	0.4862	1.72e-07	30871403
11	66790285	66790285	SYT12	blood	-	-	0.24073	2.79e-07	30871403
19	3869345	3869345	ZFR2	blood	-	-	0.30684	4.35e-07	30871403
12	25801601	25801601	IFLTD1	blood	-	-	-0.30554	6.65e-07	30871403
14	101194748	101194748	DLK1	blood	-	-	0.18266	8.04e-07	30871403
10	6188149	6188149	PFKFB3	blood	-	-	0.15204	8.24e-07	30871403
12	133003907	133003907		blood	-	-	-0.59444	1.17e-06	30871403
1	17636898	17636898		blood	-	-	0.52986	1.22e-06	30871403
12	25801522	25801522	IFLTD1	blood	-	-	-0.3044	1.56e-06	30871403
19	11465311	11465311	AC024575.1	blood	-	-	-0.24711	2.16e-06	30871403
14	101194267	101194267	DLK1	blood	-	-	0.20548	2.22e-06	30871403
12	25801455	25801455	IFLTD1	blood	-	-	-0.26773	2.52e-06	30871403
19	1005248	1005248		blood	-	-	0.20412	2.57e-06	30871403
10	75012359	75012359	MRPS16	blood	-	-	-0.29904	2.57e-06	30871403
8	144222401	144222401		blood	-	-	0.26984	3.03e-06	30871403
13	36430582	36430582	DCLK1	blood	-	-	0.31522	3.19e-06	30871403
12	108070383	108070383		blood	-	-	-0.2781	3.19e-06	30871403
14	102487020	102487020	DYNC1H1	blood	-	-	0.09433	3.24e-06	30871403
14	103569340	103569340	EXOC3L4	blood	-	-	0.29651	3.33e-06	30871403
12	16757954	16757954	LMO3	blood	-	-	-0.13991	3.68e-06	30871403
14	101195312	101195312		blood	-	-	0.15255	3.72e-06	30871403
10	135341528	135341528	CYP2E1	blood	-	-	0.3555	4.02e-06	30871403
14	105830631	105830631	PACS2	blood	-	-	-0.38021	4.56e-06	30871403
3	133574742	133574742	RAB6B	blood	-	-	-0.25162	4.8e-06	30871403
17	65471461	65471461		blood	-	-	0.13906	5.05e-06	30871403
17	81041828	81041828	METRNL	blood	-	-	-0.00026	0.693	30871403
18	42339206	42339206		blood	-	-	-0.00058	0.285	30871403
7	4175865	4175865	SDK1	blood	-	-	0.00244	2.3e-05	30871403
12	125028339	125028339	NCOR2	blood	-	-	-0.00276	1.38e-06	30871403
19	47016623	47016623		blood	-	-	-0.00045	0.293	30871403
19	45886078	45886078		blood	-	-	0.00152	0.438	30871403
1	156617074	156617074	BCAN	blood	-	-	-0.00088	0.664	30871403
7	74075293	74075293	GTF2I	blood	-	-	-0.00107	0.671	30871403
1	19996240	19996240		blood	-	-	-0.00105	0.00219	30871403
13	112554122	112554122	LINC00354	blood	-	-	5e-05	0.871	30871403
5	139196457	139196457		blood	-	-	-0.00285	0.142	30871403
16	8780048	8780048	ABAT	blood	-	-	-0.00091	0.00188	30871403
21	46409994	46409994	LINC00163	blood	-	-	-0.00114	0.416	30871403
11	1718086	1718086	KRTAP5	blood	-	-	-0.00022	0.407	30871403
13	21081216	21081216		blood	-	-	-0.00311	0.00066	30871403
4	119095240	119095240		blood	-	-	0.0003	0.944	30871403
20	1504932	1504932		blood	-	-	-0.00053	0.849	30871403
4	871629	871629		blood	-	-	-1e-05	0.995	30871403
7	36919658	36919658	ELMO1	blood	-	-	-0.0004	0.00961	30871403
2	240099221	240099221	HDAC4	blood	-	-	-0.00058	0.487	30871403
20	56772325	56772325		blood	-	-	9.91e-06	0.99	30871403
8	144737908	144737908	ZNF623	blood	-	-	-0.00017	0.851	30871403
17	38094692	38094692		blood	-	-	-5e-05	0.714	30871403
8	140712424	140712424		blood	-	-	0.00037	0.662	30871403
16	81944150	81944150	PLCG2	blood	-	-	2e-05	0.852	30871403
7	101860421	101860421		blood	-	-	-0.00023	0.769	30871403
16	88624807	88624807		blood	-	-	-0.00023	0.743	30871403
15	74943647	74943647	EDC3	blood	-	-	-0.00027	0.69	30871403
5	138629019	138629019	MATR3	blood	-	-	-0.00417	0.226	30871403
7	74075293	74075293	GTF2I	blood	-	-	-0.00107	0.671	30871403
19	45886078	45886078		blood	-	-	0.00152	0.438	30871403
19	58740861	58740861	ZNF544	blood	-	-	-0.00204	0.29	30871403
21	46409994	46409994	LINC00163	blood	-	-	-0.00114	0.416	30871403
5	139196457	139196457		blood	-	-	-0.00285	0.142	30871403
1	156617074	156617074	BCAN	blood	-	-	-0.00088	0.664	30871403
1	11621054	11621054		blood	-	-	0.00038	0.803	30871403
18	44226771	44226771		blood	-	-	-0.0015	0.308	30871403
15	29903900	29903900	RP11-300A12	blood	-	-	-0.00297	0.0548	30871403
5	149520120	149520120	PDGFRB	blood	-	-	-0.00151	0.189	30871403
5	141245719	141245719	PCDH1	blood	-	-	-0.00139	0.238	30871403
4	119095240	119095240		blood	-	-	0.0003	0.944	30871403
4	871629	871629		blood	-	-	-1e-05	0.995	30871403
12	131188144	131188144	RIMBP2	blood	-	-	0.00156	0.116	30871403
7	5388895	5388895		blood	-	-	0.00025	0.794	30871403
11	114760598	114760598		blood	-	-	0.00014	0.887	30871403
17	7440546	7440546	Y_RNA	blood	-	-	0.00113	0.22	30871403
2	240099221	240099221	HDAC4	blood	-	-	-0.00058	0.487	30871403
1	1683738	1683738	NADK	blood	-	-	0.00067	0.378	30871403
14	105912598	105912598	MTA1	blood	-	-	6e-05	0.939	30871403
8	144737908	144737908	ZNF623	blood	-	-	-0.00017	0.851	30871403
8	140712424	140712424		blood	-	-	0.00037	0.662	30871403
13	114746915	114746915		blood	-	-	0.00036	0.652	30871403
17	72350710	72350710	KIF19	blood	-	-	-0.00156	0.641	30871403
11	68715658	68715658		blood	-	-	0.00114	0.695	30871403
10	77352287	77352287		blood	-	-	0.00087	0.734	30871403
10	34999169	34999169		blood	-	-	0.00023	0.871	30871403
20	18446362	18446362	DZANK1	blood	-	-	0.00091	0.632	30871403
6	150217448	150217448	RAET1E	blood	-	-	-0.00227	0.183	30871403
7	142012988	142012988	TRBV4	blood	-	-	-0.00114	0.731	30871403
5	140562034	140562034	PCDHB16	blood	-	-	-0.00042	0.829	30871403
16	51603716	51603716	-	blood	-	-	-0.00192	0.57	30871403
6	46703468	46703468	PLA2G7	blood	-	-	-0.00262	0.294	30871403
20	1504932	1504932		blood	-	-	-0.00053	0.849	30871403
1	25257058	25257058	RUNX3	blood	-	-	-0.00055	0.00331	30871403
16	4526765	4526765	NMRAL1	blood	-	-	-0.00046	0.00278	30871403
16	71918265	71918265	ZNF821	blood	-	-	-0.00019	0.137	30871403
6	24646282	24646282	KIAA0319	blood	-	-	-0.00021	0.0451	30871403
16	29985156	29985156	TAOK2	blood	-	-	-0.00023	0.0787	30871403
6	36098567	36098567	MAPK13	blood	-	-	-0.00014	0.057	30871403
16	29801882	29801882	KIF22	blood	-	-	-0.00028	0.000327	30871403
11	9685562	9685562	SWAP70	blood	-	-	-0.00012	0.222	30871403
9	91933717	91933717	SECISBP2	blood	-	-	-0.00022	0.00545	30871403
14	90422250	90422250	EFCAB11	blood	-	-	-0.00012	0.283	30871403
3	138313166	138313166	CEP70	blood	-	-	-0.00022	0.00833	30871403
18	60190218	60190218	ZCCHC2	blood	-	-	-0.00011	0.0965	30871403
12	8850385	8850385	RIMKLB	blood	-	-	-0.00019	0.0185	30871403
9	-	-	PTGDS	Brain	-	-		3.28e-06	32650713
13	-	-		Brain	-	-		4.3e-05	32650713
1	-	-	PEX19	Brain	-	-		4.98e-05	32650713
1	-	-	GNG4	Brain	-	-		6.41e-05	32650713
1	-	-	NID1	Brain	-	-		7.32e-05	32650713
11	-	-	MICALCL	Brain	-	-		8.24e-05	32650713
2	-	-	GCC2	Brain	-	-		9.74e-05	32650713
7	-	-	WNT16	blood	-	-		9.04e-07	32650713
9	-	-	ENTPD8	blood	-	-		1.47e-06	32650713
20	-	-	SLC23A2	blood	-	-		1.51e-06	32650713
17	-	-	ARRB2	blood	-	-		1.53e-06	32650713
1	-	-	WDR8	blood	-	-		3.82e-06	32650713
16	-	-	QPRT	blood	-	-		4.02e-06	32650713
7	-	-	RFC2	blood	-	-		4.62e-06	32650713
5	-	-	MYO10	blood	-	-		6.05e-06	32650713
16	-	-	QPRT	blood	-	-		6.11e-06	32650713
14	-	-	RNASE2	blood	-	-		7.65e-06	32650713
17	-	-	SPAG5	blood	-	-		8.37e-06	32650713
X	-	-	CCNB3	blood	-	-		8.51e-06	32650713
3	-	-	ZMYND10	blood	-	-		9.38e-06	32650713
3	-	-	SLC6A20	blood	-	-		1.13e-05	32650713
8	-	-	TRAPPC9	blood	-	-		1.38e-05	32650713
1	-	-	C1orf61	blood	-	-		1.53e-05	32650713
7	-	-	POR	blood	-	-		1.63e-05	32650713
2	-	-	SNTG2	blood	-	-		1.71e-05	32650713
6	-	-	SGK1	blood	-	-		1.75e-05	32650713
4	-	-	PPP2R2C	blood	-	-		1.84e-05	32650713
10	-	-	VTI1A	blood	-	-		1.95e-05	32650713
4	-	-	SORCS2	blood	-	-		1.97e-05	32650713
20	-	-	TOX2	blood	-	-		2.11e-05	32650713
1	-	-	LHX8	blood	-	-		2.13e-05	32650713
17	-	-	CHD3	blood	-	-		2.16e-05	32650713
2	-	-	HOXD3	blood	-	-		2.33e-05	32650713
6	-	-	XPO5; POLH	blood	-	-		2.47e-05	32650713
7	-	-	DNAJB6	blood	-	-		2.73e-05	32650713
13	-	-	C13orf33	blood	-	-		2.79e-05	32650713
1	-	-	AK2	blood	-	-		2.91e-05	32650713
10	-	-	KNDC1	blood	-	-		3e-05	32650713
17	-	-	MAPT	blood	-	-		3.23e-05	32650713
5	-	-	PCDHB18	blood	-	-		3.59e-05	32650713
6	-	-	EXOC2	blood	-	-		3.65e-05	32650713
20	-	-	C20orf11	blood	-	-		4.07e-05	32650713
14	-	-	PACS2	Brain	-	-		1.18e-06	32650713
14	-	-	PACS2	Brain	-	-		1.6e-05	32650713
13	-	-	TFDP1	Brain	-	-		1.68e-05	32650713
13	-	-	DNAJC15	Brain	-	-		1.73e-05	32650713
13	-	-	DNAJC15	Brain	-	-		2.82e-05	32650713
19	-	-	IRF2BP1	Brain	-	-		5.28e-05	32650713
22	-	-	MAPK8IP2	Brain	-	-		6.08e-05	32650713
5	-	-		Brain	-	-		8.05e-05	32650713
13	-	-	DNAJC15	blood	-	-		9.55e-06	32650713
4	-	-		blood	-	-		1.1e-05	32650713
11	-	-	AP2A2	blood	-	-		1.94e-05	32650713
10	-	-	CNNM2	blood	-	-		2.03e-05	32650713
15	-	-	SMAD3	blood	-	-		2.18e-05	32650713
3	-	-	CD47	blood	-	-		3.24e-05	32650713
1	-	-		blood	-	-		3.58e-05	32650713
7	-	-	ATXN7L1	blood	-	-		3.71e-05	32650713
5	-	-	ODZ2	blood	-	-		4.06e-05	32650713
9	-	-	DMRT1	blood	-	-		4.26e-05	32650713
15	-	-	GABRB3	blood	-	-		4.53e-05	32650713
16	-	-	NRN1L	blood	-	-		4.87e-05	32650713
19	-	-	LEUTX	blood	-	-		5.1e-05	32650713
2	-	-	BIN1	blood	-	-		5.33e-05	32650713
14	-	-	FLRT2	blood	-	-		5.97e-05	32650713
19	-	-	CCDC124	blood	-	-		6.13e-05	32650713
2	-	-	EPHA4	blood	-	-		7.07e-05	32650713
X	-	-	TBC1D8B	blood	-	-		9.91e-05	32650713
-	-	-	C1QTNF7	Brain	-	-		0.000549	32650713
-	-	-	DNAJC15	Brain	-	-		7.56e-05	32650713
-	-	-	CORO7	Brain	-	-		0.00078	32650713
-	-	-	TMCO3	Brain	-	-		0.000463	32650713
-	-	-	MPPED1	Brain	-	-		0.000531	32650713
-	-	-	C14orf182	Brain	-	-		0.000436	32650713
-	-	-	C1QTNF7	blood	-	-		0.000328	32650713
-	-	-	DNAJC15	blood	-	-		0.000302	32650713
-	-	-	CORO7	blood	-	-		0.000141	32650713
-	-	-	TMCO3	blood	-	-		0.000172	32650713
-	-	-	MPPED1	blood	-	-		0.000912	32650713
-	-	-	C14orf182	blood	-	-		0.000925	32650713

## Sheet: CSV_vs_Brain
online_db_brain	CSF
AATF	A1BG
ABCA3	ABAT
AKAP6	ABCC8
ALG1L	ABHD12B
AMZ1	ABLIM2
ANXA2	ABRA
APBA1	ABRACL
ARHGAP22	ABRAXAS2
ARHGEF10	ACACA
ARHGEF12	ACAN
ARSB	ACER2
ASAP2	ACIN1
ATP2A3	ACLY
ATP8A2	ACMSD
B4GALNT3	ACP2
BANF2	ACSBG1
BANP	ACSM6
BICD2	ACTR3B
C10orf46	ACVR1B
C10orf58	ADAM10
C10orf71	ADAM20
C14orf126	ADAM32
C14orf182	ADAM9
C17orf57	ADAMTS18
C1orf52	ADAMTS5
C1QTNF7	ADAMTS9
C21orf56	ADARB2
C3orf21	ADCK5
CAPN8	ADCY10
CCR6	ADGRA3
CLECL1	ADGRG6
CNTNAP2	ADGRL3
COL11A2	ADH6
COL6A3	ADIG
COQ3	ADIPOR2
CORO7	ADPRH
CPAMD8	ADRM1
CPLX2	ADSS2
CR1L	AEBP2
CTNNA2	AFF2
CUL3	AFF3
CYFIP2	AFTPH
DCUN1D2	AGAP1
DIRC3	AGBL1
DMBX1	AGFG1
DNAH9	AGMAT
DNAJA3	AGO4
DNAJC15	AGPAT5
DSE	AGPS
ERAL1	AGRN
ESRRG	AGXT2
FAM132A	AJAP1
FAT1	AKAP6
FCRLA	AKR1B15
FHIT	AKT1S1
FLJ31306	ALG10
FLJ32810	ALKAL1
FLJ37201	ALKAL2
FOXK1	ALPK2
FRK	AMIGO2
GCC2	AMMECR1
GCK	ANGPTL3
GFPT2	ANKRD1
GNG4	ANKRD13B
GPR125	ANKRD17
GSTT1	ANKRD20A3
GSTTP1	ANKRD37
GSTTP2	ANKRD6
GZMM	ANO2
HLA-DPB2	ANP32C
HLA-DQA1	AP3B1
HLA-DQB1	AP4B1
HLA-DRB1	AP5Z1
HLA-DRB5	APBA2
HLA-DRB6	APC
HLA-G	APCDD1
IRF2BP1	API5
ITPR1	APLF
JAKMIP3	APOBEC2
KCNH1	APOC1
KCTD5	AQP11
KIAA0513	AR
LASS3	ARHGAP21
LGALS7	ARHGAP23
LIMS1	ARHGAP28
LOC100292680	ARHGAP32
LOC283267	ARHGAP39
LOC391322	ARHGAP44
LRRC27	ARHGEF11
LRRK1	ARHGEF37
MAGI2	ARHGEF38
MAML2	ARHGEF4
MAPK10	ARID3B
MAPK8IP2	ARMC10
MAPT	ARPC1A
MCC	ARSF
MICALCL	ARSJ
MIR886	ASB1
MMEL1	ASB15
MOG	ASB4
MORF4	ASB7
MPPED1	ASGR1
MRI1	ASH2L
MRPL3	ASIC2
MYOM2	ASIC3
NDUFA10	ASTN2
NID1	ASXL3
NPHP4	ATF7IP
NTM	ATG2A
OPRD1	ATG4D
OPRM1	ATL2
OR10K1	ATP13A4
OR12D3	ATP2A2
OSBPL9	ATP2B2
PACS2	ATP2B3
PCSK9	ATP2B4
PEX19	ATP5MC2
PFKL	ATP5MGL
PIK3R2	ATP6V0A1
PPIF	ATP6V0A2
PRHOXNB	ATP6V1B1
PRM1	ATP6V1C1
PTGDS	ATP6V1C2
PTPRN2	ATP6V1E2
PVT1	ATP7B
PWWP2B	ATRN
PYROXD1	ATXN2L
RASA3	ATXN3L
RHOF	ATXN7L1
RNF39	AUTS2
SERPINA9	AVEN
SH3PXD2A	AVIL
SLC12A5	AVPR1B
SLC25A24	AXDND1
SLC26A10	AXIN2
SMC1B	AZIN1
SMOC2	B3GALT2
SMYD3	B3GAT2
SPATS2L	B3GAT3
SPTBN4	B3GNTL1
STEAP3	BACE1
STT3A	BATF3
TCP10L2	BCHE
TFDP1	BCL11A
TGFBI	BCL2
TIMP2	BCL2L11
TLE1	BCL7A
TMCO3	BDNF
TMEM132B	BEGAIN
TMEM9	BEND7
TNFSF8	BEST2
TOX2	BEST3
TPK1	BHMG1
TRABD	BIN3
TRIM10	BIRC6
TRIM27	BIRC8
TRIML2	BLCAP
TSPAN9	BLID
TUBA3E	BMP6
USP7	BMP7
UST	BMP8A
VAV2	BMPR1B
VPS72	BMX
VSX2	BNC2
WDR27	BNIP3L
WDR66	BOD1L1
XAB2	BOD1L2
YAP1	BORCS5
ZNF117	BPIFB1
ZNF783	BRAF
	BRCA1
	BRD4
	BRINP1
	BRINP2
	BRIX1
	BRSK2
	BRWD1
	BTBD1
	BTBD18
	BTBD9
	BTD
	BTN3A1
	BTRC
	C10orf67
	C10orf90
	C11orf16
	C11orf49
	C11orf88
	C11orf98
	C12orf4
	C14orf180
	C15orf61
	C16orf95
	C17orf75
	C19orf53
	C19orf84
	C1GALT1
	C1orf115
	C1orf122
	C1orf127
	C1orf21
	C1QL3
	C1QTNF7
	C20orf194
	C20orf203
	C21orf58
	C21orf62
	C2orf72
	C5orf15
	C5orf49
	C5orf58
	C5orf60
	C6orf120
	C6orf163
	C7orf26
	C7orf61
	C8orf34
	C8orf58
	C8orf76
	C8orf89
	C9orf57
	CA10
	CA3
	CAB39
	CACFD1
	CACNA1C
	CACNA1I
	CACNA2D1
	CACNA2D3
	CACNA2D4
	CACNB3
	CACNG3
	CACNG8
	CADM2
	CAMTA1
	CAMTA2
	CAPNS1
	CARD11
	CARMIL2
	CASC4
	CASP3
	CASP7
	CASP8AP2
	CASQ1
	CATSPER2
	CATSPERG
	CBLB
	CBWD3
	CBY2
	CC2D1B
	CCDC102B
	CCDC105
	CCDC121
	CCDC124
	CCDC126
	CCDC157
	CCDC171
	CCDC175
	CCDC180
	CCDC181
	CCDC192
	CCDC27
	CCDC3
	CCDC30
	CCDC33
	CCDC40
	CCDC58
	CCDC60
	CCDC85B
	CCDC88A
	CCDC88B
	CCDC97
	CCL23
	CCNA2
	CCNE2
	CCNL1
	CCT2
	CD14
	CD19
	CD1E
	CD247
	CD302
	CD3EAP
	CD40LG
	CD55
	CD6
	CDC14A
	CDC42EP2
	CDC42SE2
	CDCA7L
	CDH13
	CDH20
	CDH23
	CDH4
	CDH6
	CDK13
	CDK17
	CDK19
	CDK2
	CDK6
	CDK7
	CDKL4
	CDKN3
	CDON
	CDRT15
	CDX2
	CEACAM18
	CEACAM4
	CEBPE
	CEBPZ
	CECR2
	CELF2
	CELF4
	CELSR1
	CEMP1
	CENPL
	CENPN
	CENPP
	CEP104
	CEP41
	CEP63
	CEP85
	CEP89
	CERS4
	CERT1
	CES4A
	CFAP221
	CFAP300
	CFAP44
	CFAP57
	CFAP58
	CFAP70
	CFAP74
	CFHR1
	CFHR4
	CFLAR
	CGNL1
	CHADL
	CHCHD2
	CHIC2
	CHKB
	CHL1
	CHN2
	CHP1
	CHRDL2
	CHRM5
	CHRNA1
	CHRNA7
	CHST12
	CHSY1
	CHSY3
	CIDEA
	CIR1
	CIRBP
	CLDN12
	CLDN24
	CLDN4
	CLEC2L
	CLPB
	CLUH
	CLYBL
	CNIH4
	CNNM1
	CNOT10
	CNOT6
	CNOT6L
	CNPY2
	CNR1
	CNTN2
	CNTN4
	CNTN6
	CNTNAP2
	CNTROB
	COBL
	COCH
	COG2
	COG3
	COG4
	COL12A1
	COL13A1
	COL14A1
	COL15A1
	COL1A1
	COL20A1
	COL26A1
	COL3A1
	COL4A4
	COL6A1
	COL6A2
	COLCA1
	COLCA2
	COMP
	COPS2
	COPS9
	COQ10B
	COQ6
	COX15
	COX7B2
	CPLX4
	CPNE4
	CPPED1
	CPQ
	CPSF4
	CPXCR1
	CPXM1
	CPXM2
	CPZ
	CR1
	CREB5
	CRNN
	CSF3
	CSGALNACT2
	CSMD1
	CSPG4
	CSRNP3
	CSTL1
	CTH
	CTNNA1
	CTNND1
	CTNND2
	CTSF
	CTSO
	CUL2
	CUL4A
	CUL7
	CUX1
	CUX2
	CWC22
	CWF19L1
	CWH43
	CXCL12
	CXCL8
	CXCR5
	CXorf40B
	CXorf58
	CXorf66
	CYP1A1
	CYP2D7
	CYP4F12
	CYP7B1
	CYTH1
	DAB1
	DAB2
	DAB2IP
	DACH1
	DAPK3
	DAZAP1
	DCAF11
	DCAF17
	DCC
	DCP1B
	DCTPP1
	DCUN1D2
	DDX11
	DDX4
	DDX52
	DDX54
	DEFB123
	DEFB124
	DEGS2
	DEK
	DELE1
	DENND1A
	DENND2A
	DENND5B
	DESI1
	DGCR6
	DGKB
	DGKG
	DGKH
	DGUOK
	DHCR7
	DHRS4L1
	DHX15
	DICER1
	DIO2
	DIP2C
	DIRAS2
	DKK2
	DKK4
	DLG2
	DLGAP1
	DLL4
	DLX6
	DMAC2
	DMBX1
	DNAH5
	DNAH7
	DNAH8
	DNAJB11
	DNAJB6
	DNAJC10
	DNAJC11
	DNAJC21
	DNAJC25
	DNAJC27
	DNAJC9
	DNMT1
	DNMT3A
	DNPH1
	DOC2B
	DOCK3
	DOCK4
	DPEP2NB
	DPF3
	DPP10
	DPPA3
	DPPA5
	DPY19L1
	DPY19L4
	DPY30
	DPYD
	DRAXIN
	DRICH1
	DSCAM
	DSCAML1
	DSEL
	DST
	DTNA
	DTNB
	DTWD2
	DUS2
	DUSP16
	DUSP19
	DUSP26
	DUSP27
	DUSP28
	DUSP3
	DUSP6
	DUT
	DYDC1
	DYRK2
	DYRK3
	E2F3
	E2F8
	ECHDC1
	EDA2R
	EDAR
	EDDM3B
	EEF1AKMT2
	EEFSEC
	EFCAB2
	EFCAB3
	EFCAB6
	EFHC1
	EFHD1
	EFNA2
	EFR3A
	EFR3B
	EHBP1
	EHD1
	EIF2B5
	EIF3E
	EIF4A2
	EIF4A3
	EIF5A
	EIF5A2
	ELFN1
	ELMO2
	ELOF1
	ELOVL4
	ELOVL6
	ELP2
	EMC1
	EML3
	ENPEP
	ENSA
	EPB41L3
	EPDR1
	EPHA3
	EPHA4
	EPHB1
	EPHB2
	EPM2A
	EPOR
	EPS15
	ERC2
	ERI1
	ERLIN1
	ERMARD
	ERMP1
	ERO1B
	ERVFRD-1
	ETV2
	EVC2
	EVL
	EXOC6
	EYA1
	EZH1
	F11
	F13A1
	F2R
	F2RL3
	FAAP20
	FAAP24
	FABP4
	FADD
	FAH
	FAM102A
	FAM110B
	FAM117A
	FAM124B
	FAM135A
	FAM149A
	FAM153B
	FAM160A1
	FAM160B1
	FAM162A
	FAM163A
	FAM166C
	FAM169A
	FAM181B
	FAM184A
	FAM184B
	FAM189A1
	FAM199X
	FAM240A
	FAM241B
	FAM24A
	FAM32A
	FAM47C
	FAM49B
	FAM81A
	FAM83F
	FAM89B
	FAM98C
	FANCA
	FAS
	FASTK
	FAT4
	FAXC
	FBH1
	FBL
	FBLIM1
	FBLN5
	FBN1
	FBXL17
	FBXL4
	FBXO11
	FBXO24
	FBXO36
	FBXO44
	FBXO9
	FCAR
	FCRL3
	FDCSP
	FEM1B
	FERMT1
	FEZF2
	FFAR3
	FGD4
	FGF5
	FGFBP3
	FHAD1
	FIBCD1
	FIG4
	FIP1L1
	FIZ1
	FKRP
	FLAD1
	FMN1
	FMN2
	FMNL2
	FNDC1
	FNDC7
	FOPNL
	FOSL2
	FOXA3
	FOXC1
	FOXD3
	FOXD4L3
	FOXK2
	FOXN3
	FOXO4
	FOXP2
	FPR2
	FRAS1
	FRMD3
	FRMD4A
	FRMD4B
	FRMD5
	FRMPD1
	FSCB
	FSIP1
	FSIP2
	FSTL4
	FTCDNL1
	FUOM
	FUT8
	FUT9
	FXYD6
	FYB1
	FZD3
	GABARAPL2
	GABBR2
	GABRA6
	GABRG3
	GADL1
	GAK
	GALNT10
	GALNT15
	GALNT16
	GALNT18
	GALNT7
	GALR1
	GAP43
	GAPDHS
	GATA1
	GATA6
	GATD1
	GBP5
	GBX1
	GC
	GCLC
	GDF15
	GDF7
	GDPD5
	GEMIN5
	GET1
	GFM1
	GFPT1
	GFRA2
	GFRAL
	GGT2
	GGTLC1
	GH1
	GIMAP4
	GLB1L3
	GLDN
	GLI2
	GLIPR1L1
	GLIS3
	GLRX3
	GLS
	GLUL
	GLYAT
	GMPPB
	GNA11
	GNAI2
	GNAL
	GNAS
	GNB5
	GNG10
	GNG12
	GNG4
	GNG7
	GNL2
	GNPAT
	GNRH1
	GOLGA3
	GOLGB1
	GOLPH3
	GOT1L1
	GPC1
	GPC5
	GPC6
	GPNMB
	GPR179
	GPR35
	GPR4
	GPT2
	GRAP2
	GRB2
	GREB1
	GREB1L
	GRID1
	GRIK1
	GRIK2
	GRIK3
	GRIK4
	GRM3
	GRM4
	GRM8
	GSK3A
	GSK3B
	GSTP1
	GSTT4
	GTDC1
	GTF2F2
	GTF2H5
	GTF2I
	GTF3A
	GTF3C1
	GTF3C4
	GUCA1B
	GULP1
	GXYLT2
	GYG1
	GYG2
	H2AC14
	H2AC4
	H2AX
	H2BC1
	H2BC18
	H3-2
	H3C10
	H4C13
	HABP4
	HACD2
	HBP1
	HCN2
	HCN4
	HDAC9
	HDGFL3
	HDLBP
	HEATR3
	HECTD1
	HECTD2
	HECW1
	HEG1
	HEPACAM2
	HERPUD2
	HEXB
	HGF
	HIF1A
	HIGD1B
	HINT3
	HIRA
	HLA-DQB1
	HLCS
	HMGN3
	HMSD
	HNRNPA1
	HNRNPC
	HNRNPL
	HNRNPUL2
	HORMAD1
	HOXC13
	HP1BP3
	HPCAL4
	HPF1
	HPRT1
	HPSE2
	HPX
	HRK
	HS3ST3A1
	HS3ST4
	HS3ST5
	HSBP1L1
	HSD17B1
	HSD17B10
	HSF5
	HSPA6
	HSPB11
	HTR1A
	HTR4
	HTRA1
	HTT
	HUNK
	HUS1B
	HVCN1
	IBSP
	ICAM2
	IDS
	IFNL3
	IFT22
	IGF2BP3
	IGFBP3
	IGFBP6
	IGFBP7
	IKBIP
	IKZF2
	IKZF3
	IKZF5
	IL12B
	IL12RB2
	IL17RC
	IL1A
	IL1R1
	IL1RL2
	IL22RA2
	IL31RA
	IL36B
	ILF2
	IMPA1
	IMPACT
	IMPG1
	INAFM2
	INCA1
	INHBA
	INHBB
	INVS
	IQCM
	IRF4
	ISCA1
	ISCU
	ISM1
	ISX
	ITFG2
	ITGA1
	ITGA3
	ITGA8
	ITGA9
	ITGB6
	ITIH4
	ITM2A
	ITPK1
	JADE3
	JAG2
	JAK2
	JAZF1
	JCAD
	JMY
	JOSD1
	JPH2
	JPT1
	JPT2
	JRKL
	JUP
	KALRN
	KAT6A
	KAZN
	KBTBD6
	KCNA3
	KCNA4
	KCNC1
	KCNC3
	KCND3
	KCNE1
	KCNF1
	KCNG3
	KCNH8
	KCNJ10
	KCNJ11
	KCNK13
	KCNK3
	KCNK9
	KCNMA1
	KCNN2
	KCNN3
	KCNQ1
	KCNQ3
	KCNQ5
	KCTD11
	KCTD16
	KCTD17
	KCTD21
	KCTD5
	KDM2B
	KDM7A
	KDR
	KDSR
	KHDRBS3
	KHNYN
	KIAA0825
	KIAA1191
	KIAA1211L
	KIAA1257
	KIF19
	KIF23
	KIF3B
	KIF5A
	KIR3DL2
	KIRREL3
	KLC1
	KLF12
	KLF13
	KLF3
	KLF5
	KLHDC7A
	KLHL1
	KLHL14
	KLHL17
	KLHL21
	KLHL22
	KLHL24
	KLHL35
	KLK15
	KLK6
	KLRC3
	KMT2B
	KMT5C
	KNG1
	KRIT1
	KRT19
	KRT23
	KRT6A
	KRT82
	KRTAP10-12
	KRTAP10-9
	KRTAP1-4
	KRTAP4-3
	KRTAP5-4
	KRTAP9-3
	L3MBTL3
	LARGE1
	LAX1
	LCE1E
	LCE2A
	LCK
	LCORL
	LDAH
	LDHAL6B
	LDLRAD3
	LEPR
	LEPROT
	LHFPL2
	LHX2
	LIM2
	LIMCH1
	LINS1
	LIPH
	LIX1L
	LOC100996842
	LOC102724957
	LOC112577516
	LOC112694756
	LOC284898
	LOC388813
	LOXHD1
	LOXL2
	LOXL3
	LPAR1
	LPAR2
	LPCAT1
	LRCOL1
	LRFN2
	LRIG3
	LRMDA
	LRMP
	LRP12
	LRP2
	LRP5L
	LRRC10B
	LRRC45
	LRRC49
	LRRC4B
	LRRC4C
	LRRC7
	LRRC72
	LRRC9
	LRTM2
	LSMEM2
	LSS
	LTBR
	LTO1
	LTV1
	LVRN
	LY75
	LYPD1
	LYPD5
	LYPLA1
	LYVE1
	LYZL2
	MAB21L1
	MACROH2A2
	MADCAM1
	MAF1
	MAFK
	MAGI1
	MAL2
	MALRD1
	MAMDC2
	MANBA
	MAP1S
	MAP2K4
	MAP2K5
	MAP2K7
	MAP3K10
	MAP3K21
	MAP3K9
	MAP4K1
	MAP4K5
	MAPK10
	MARCHF11
	MARCHF5
	MARCOL
	MARK3
	MAST1
	MAT1A
	MATN2
	MBD3L2B
	MC2R
	MCC
	MCCC2
	MCM3
	MCM4
	MCM5
	MCM9
	MDGA2
	MDM4
	ME3
	MEAF6
	MED12
	MED16
	MED6
	MEF2C
	MEGF10
	MEGF11
	MEGF9
	MEOX2
	METTL14
	METTL23
	METTL25
	METTL3
	MEX3C
	MFSD4A
	MGAT3
	MGAT4D
	MGLL
	MICALL1
	MICU1
	MIDN
	MIER1
	MINDY4
	MLF2
	MLH1
	MLXIPL
	MME
	MMEL1
	MMP24
	MN1
	MOB3B
	MOCOS
	MOGAT2
	MOGS
	MORC2
	MORC4
	MORF4L1
	MORN5
	MOSMO
	MOSPD2
	MPC1L
	MPP7
	MPZ
	MRFAP1
	MRM2
	MRPL10
	MRPL14
	MRPL15
	MRPL24
	MRPL28
	MRPL3
	MRPL49
	MRPL53
	MRPS16
	MRPS31
	MRPS7
	MS4A3
	MSH3
	MSLN
	MSRB3
	MTA1
	MTAP
	MTBP
	MTHFD1L
	MTHFSD
	MTMR10
	MTMR6
	MTR
	MTREX
	MTX1
	MVB12B
	MYBL2
	MYBPH
	MYCBPAP
	MYH2
	MYH3
	MYH4
	MYH9
	MYL7
	MYLK
	MYLPF
	MYO10
	MYO18B
	MYO1A
	MYO1E
	MYO3A
	MYO5B
	MYO6
	MYORG
	MYRIP
	MYSM1
	MYT1
	MYT1L
	N4BP1
	NABP1
	NABP2
	NAGK
	NAMPT
	NAT1
	NAV1
	NAV2
	NAV3
	NBEAL1
	NCAN
	NCAPG
	NCAPG2
	NCDN
	NCKAP5
	NDC1
	NDC80
	NDST3
	NDUFAF1
	NDUFAF4
	NDUFB10
	NEB
	NECAB2
	NECAP2
	NEK10
	NEK2
	NEK7
	NEK9
	NELL2
	NEMP2
	NETO1
	NFASC
	NFAT5
	NFATC3
	NFE2L3
	NFIB
	NFIL3
	NFKB1
	NFKBID
	NGFR
	NHLRC4
	NHS
	NIBAN2
	NINL
	NIPSNAP3B
	NKAIN2
	NKAIN4
	NKG7
	NKRF
	NKX2-1
	NKX2-2
	NLRP2B
	NMBR
	NME9
	NMNAT2
	NOMO1
	NOP14
	NOTCH3
	NOVA2
	NOX4
	NPAS1
	NPAS3
	NPEPPS
	NPHP1
	NPIPB3
	NPIPB4
	NPL
	NPM1
	NPM3
	NPPA
	NPRL2
	NR2C2AP
	NR2F1
	NR3C2
	NRBP1
	NRG2
	NRGN
	NRIP1
	NSG2
	NSMAF
	NTF3
	NTM
	NTN4
	NTPCR
	NTSR1
	NUAK1
	NUBPL
	NUDT14
	NUP153
	NUP188
	NUP88
	NUSAP1
	NUTF2
	NUTM2A
	NWD1
	NWD2
	NXNL2
	NXPH1
	NYNRIN
	NYX
	OCA2
	ODAM
	OGDHL
	OGFOD2
	OLFM1
	OPRPN
	OR10W1
	OR14C36
	OR1A2
	OR1C1
	OR2D2
	OR2L13
	OR2L2
	OR2M3
	OR4A16
	OR4C13
	OR4X1
	OR52B6
	OR52D1
	OR52E5
	OR52L1
	OR5AU1
	OR5B3
	OR6A2
	OR6C74
	OR6M1
	OR8K1
	ORC2
	OS9
	OSBP2
	OSBPL1A
	OSBPL3
	OSBPL6
	OSCAR
	OSER1
	OSGIN1
	OSM
	OSR1
	OSTF1
	OTOL1
	OTUD7A
	OXER1
	OXR1
	P2RX7
	P4HA2
	P4HB
	PA2G4
	PABPN1L
	PACSIN3
	PAFAH1B1
	PAFAH2
	PAK6
	PALLD
	PAM
	PAN2
	PAPLN
	PAPOLB
	PAPPA2
	PAQR3
	PARD3
	PARPBP
	PATE3
	PBLD
	PBX1
	PBX3
	PCDH9
	PCDHB16
	PCGF2
	PCGF6
	PCIF1
	PCNA
	PCNX4
	PCP4
	PCSK2
	PCSK6
	PCSK9
	PCYOX1
	PDCD1LG2
	PDCD4
	PDCD7
	PDCL
	PDE11A
	PDE2A
	PDE3A
	PDE4D
	PDE4DIP
	PDE6B
	PDGFD
	PDHB
	PDIA2
	PDP2
	PDPN
	PDS5B
	PDZRN3
	PEAK1
	PEAR1
	PEBP4
	PECAM1
	PELP1
	PER1
	PER3
	PET117
	PFDN1
	PFKFB3
	PFN4
	PGAM2
	PGAM4
	PGBD3
	PGBD5
	PGLYRP4
	PGM3
	PGM5
	PGR
	PGRMC2
	PHACTR1
	PHF13
	PHF20
	PHF21B
	PI15
	PICALM
	PIGK
	PIGM
	PIGN
	PIK3AP1
	PIK3C2G
	PIK3R5
	PIN1
	PINK1
	PIP5K1B
	PIPOX
	PIR
	PITRM1
	PITX3
	PKD1L2
	PKHD1L1
	PKIA
	PKM
	PKMYT1
	PKP4
	PLA2G4D
	PLAGL1
	PLB1
	PLCB1
	PLCH2
	PLD1
	PLD5
	PLEKHA5
	PLEKHA7
	PLEKHD1
	PLEKHG6
	PLEKHH1
	PLK1
	PLK3
	PLPP4
	PLPP5
	PLPPR5
	PLSCR3
	PLXDC2
	PMAIP1
	PMF1
	PNKD
	PNPLA3
	PNPO
	POC1B
	POFUT2
	POLE
	POLR1D
	POLR1E
	POLR2F
	PON2
	POU3F1
	POU5F1B
	POU5F2
	PPAN
	PPARGC1B
	PPEF2
	PPFIA2
	PPIE
	PPL
	PPM1A
	PPM1G
	PPP1R13L
	PPP1R16B
	PPP1R2
	PPP1R37
	PPP1R9A
	PPP2R2C
	PPP2R3A
	PPP2R5D
	PPP4R1
	PPTC7
	PRAMEF1
	PRAMEF2
	PRDM13
	PRDM16
	PRDM2
	PRDM6
	PRDM9
	PRDX5
	PREX1
	PRKAA2
	PRKACA
	PRKAR1B
	PRKAR2A
	PRKAR2B
	PRKCH
	PRKD1
	PRKDC
	PRLHR
	PRM3
	PRMT2
	PROM1
	PRPF40A
	PRPS1
	PRR19
	PRRC1
	PRRG4
	PRSS35
	PRSS50
	PRSS54
	PRTG
	PSAP
	PSD2
	PSG1
	PSG3
	PSMA5
	PSMD13
	PSPC1
	PSRC1
	PSTPIP2
	PTER
	PTGER3
	PTGS2
	PTHLH
	PTK2B
	PTPN20
	PTPN5
	PTPRD
	PTPRN2
	PTPRO
	PTPRQ
	PTPRS
	PTPRT
	PTRH2
	PTTG1
	PWWP2A
	PXDNL
	PXMP2
	PXYLP1
	PYGB
	QARS1
	QPCT
	R3HDM2
	RAB11FIP4
	RAB3D
	RAB6B
	RABEP1
	RABGEF1
	RABIF
	RAD21
	RALGAPA2
	RANBP17
	RAP2B
	RAPGEF4
	RAPGEFL1
	RAPSN
	RARB
	RARRES2
	RASA2
	RASA4B
	RASGRF1
	RASGRF2
	RASIP1
	RASSF10
	RBFOX1
	RBM19
	RBM22
	RBM24
	RBM27
	RBMXL2
	RBP7
	RBPMS
	RBX1
	RCC1
	RD3
	RD3L
	RDX
	REEP1
	RELCH
	RELN
	RET
	RFK
	RFTN2
	RFX8
	RGPD2
	RGS13
	RGS17
	RGS22
	RGS7BP
	RHBDL2
	RIC1
	RIMS1
	RIMS2
	RINL
	RIPOR2
	RNASE11
	RNASEH2B
	RNASEK
	RNF115
	RNF126
	RNF133
	RNF141
	RNF144A
	RNF144B
	RNF145
	RNF150
	RNF169
	RNF170
	RNF180
	RNF187
	RNF212
	RNF215
	RNF43
	RNF6
	RNPEPL1
	RNPS1
	ROBO1
	ROBO2
	ROPN1B
	ROR1
	ROR2
	RORA
	ROS1
	RPA2
	RPAP3
	RPEL1
	RPGRIP1
	RPL12
	RPL13
	RPL13A
	RPL18
	RPL22
	RPL27A
	RPL28
	RPL3
	RPL4
	RPP38
	RPS19
	RPS24
	RPS29
	RPS4Y2
	RPS6KL1
	RPS8
	RPUSD4
	RRAS
	RRM1
	RTL5
	RTL8C
	RTN1
	RTN2
	RTP5
	RUBCNL
	RUFY4
	RUNDC3B
	RUNX1T1
	RXFP2
	RYK
	RYR1
	RYR3
	S100A3
	S100PBP
	SAMD14
	SAMD15
	SAMSN1
	SARS2
	SBF2
	SBSPON
	SCAF11
	SCAMP1
	SCARA5
	SCFD2
	SCG3
	SCLY
	SCML4
	SCNN1G
	SCRIB
	SCUBE1
	SDHA
	SDHD
	SDK1
	SDR42E1
	SEC14L5
	SEC22C
	SEC24A
	SEC24D
	SEC61B
	SELE
	SELENOK
	SELENON
	SELENOV
	SEMA4F
	SEMA5A
	SEMA5B
	SENP5
	SEPHS2
	SERPINA3
	SERPINA5
	SERPINB12
	SERPINB3
	SERPINC1
	SERPINE3
	SERPINI2
	SETD1A
	SEZ6L
	SFSWAP
	SFTPA2
	SFXN1
	SFXN5
	SGCG
	SGCZ
	SH2B3
	SH2D4B
	SH3BGR
	SH3D21
	SH3PXD2B
	SHANK2
	SHB
	SHC2
	SHCBP1
	SHCBP1L
	SHH
	SHISA4
	SHISA9
	SHMT1
	SIAH1
	SIAH2
	SIGLEC11
	SIGMAR1
	SIK3
	SINHCAF
	SIRT7
	SLAMF9
	SLC12A2
	SLC12A4
	SLC13A3
	SLC15A5
	SLC16A14
	SLC17A7
	SLC18A2
	SLC18B1
	SLC19A1
	SLC1A1
	SLC1A2
	SLC1A5
	SLC22A1
	SLC22A8
	SLC24A4
	SLC25A21
	SLC25A35
	SLC25A46
	SLC25A53
	SLC26A1
	SLC26A9
	SLC28A2
	SLC28A3
	SLC29A1
	SLC2A5
	SLC2A8
	SLC30A2
	SLC30A6
	SLC35A4
	SLC35B1
	SLC35D1
	SLC35D2
	SLC37A3
	SLC39A4
	SLC39A6
	SLC41A2
	SLC44A3
	SLC44A5
	SLC4A10
	SLC6A1
	SLC6A11
	SLC6A4
	SLC6A5
	SLC7A1
	SLC7A11
	SLC7A14
	SLC8A1
	SLC8A2
	SLC9B1
	SLC9B2
	SLC9C1
	SLC9C2
	SLCO1B3
	SLCO4C1
	SLK
	SLURP2
	SMAD4
	SMAD5
	SMARCA2
	SMARCA5
	SMARCD3
	SMC4
	SMC5
	SMG7
	SMIM14
	SMIM27
	SMPDL3A
	SMTNL2
	SMURF2
	SNAI1
	SNAP47
	SNAP91
	SNCAIP
	SND1
	SNED1
	SNRPD1
	SNRPD2
	SNRPD3
	SNTG1
	SNTG2
	SNTN
	SNX30
	SNX31
	SOBP
	SORBS1
	SORCS2
	SORCS3
	SORT1
	SOX6
	SPAG9
	SPAST
	SPATA17
	SPATA31A6
	SPATS2L
	SPDYC
	SPEN
	SPG11
	SPOCD1
	SPOCK3
	SPRTN
	SPTBN2
	SPTSSA
	SPX
	SRCIN1
	SRGAP3
	SRP9
	SRSF12
	SRSF7
	SSBP3
	SSBP4
	SSH3
	ST14
	ST18
	ST6GAL1
	ST6GALNAC3
	ST7
	ST8SIA5
	STAB1
	STARD6
	STAT2
	STAU1
	STBD1
	STIM1
	STIM2
	STK16
	STK3
	STN1
	STRA6
	STRADA
	STRBP
	STRN
	STT3A
	STYK1
	SUGP1
	SUGT1
	SULF1
	SULF2
	SUMO3
	SUPV3L1
	SURF2
	SUSD1
	SUSD5
	SV2A
	SVEP1
	SYAP1
	SYCE1L
	SYDE2
	SYF2
	SYN3
	SYNPR
	SYS1
	SYT11
	SYT16
	SYT9
	TAB2
	TAC4
	TACC2
	TADA2A
	TAF8
	TAFA1
	TANC2
	TANGO6
	TAPBPL
	TARDBP
	TAS2R5
	TAX1BP1
	TBC1D10A
	TBC1D16
	TBC1D25
	TBC1D30
	TBC1D7
	TBKBP1
	TBP
	TBX21
	TBX5
	TBXAS1
	TCERG1
	TCF12
	TCF20
	TCF3
	TCF7
	TCF7L2
	TCFL5
	TCL1B
	TCP10L
	TCTE3
	TCTN2
	TEAD1
	TEAD4
	TEKT1
	TENM2
	TENM3
	TENM4
	TENT5B
	TESMIN
	TEX26
	TEX35
	TFEC
	TFF1
	TGDS
	TGFBR2
	TGFBR3
	THBS1
	THEG
	THOP1
	THSD4
	THSD7A
	THTPA
	THYN1
	TIFA
	TIGD6
	TIMM44
	TIMP3
	TIPIN
	TIPRL
	TLCD1
	TLE2
	TLK1
	TLL1
	TLL2
	TM7SF3
	TMC1
	TMC5
	TMCO1
	TMED3
	TMEFF2
	TMEM119
	TMEM126B
	TMEM131L
	TMEM132A
	TMEM132B
	TMEM132C
	TMEM132D
	TMEM132E
	TMEM135
	TMEM140
	TMEM154
	TMEM159
	TMEM161B
	TMEM17
	TMEM170A
	TMEM170B
	TMEM174
	TMEM178B
	TMEM179
	TMEM182
	TMEM198
	TMEM219
	TMEM225B
	TMEM230
	TMEM233
	TMEM235
	TMEM249
	TMEM267
	TMEM33
	TMEM41A
	TMEM51
	TMEM61
	TMEM63C
	TMEM65
	TMEM87B
	TMEM88
	TMPRSS11F
	TMPRSS15
	TMPRSS2
	TMPRSS6
	TMTC1
	TMTC4
	TNFAIP8
	TNFRSF10B
	TNFRSF10D
	TNFRSF9
	TNKS1BP1
	TNPO2
	TNS1
	TNS3
	TOM1L2
	TOPAZ1
	TOR1A
	TOR4A
	TOX3
	TPCN2
[truncated: 221 more rows]

## Sheet: CSF_vs_blood
online_db_blood	CSF
ABAT	A1BG
ABCB9	ABAT
AC024575.1	ABCC8
AK2	ABHD12B
AMPD3	ABLIM2
AP2A2	ABRA
ARRB2	ABRACL
ATXN7L1	ABRAXAS2
AZU1	ACACA
BIN1	ACAN
C13orf33	ACER2
C14orf182	ACIN1
C1orf200	ACLY
C1orf61	ACMSD
C1QTNF7	ACP2
C20orf11	ACSBG1
C3orf21	ACSM6
CALM2	ACTR3B
CARS2	ACVR1B
CBL	ADAM10
CBX2	ADAM20
CCDC124	ADAM32
CCDC57	ADAM9
CCNB3	ADAMTS18
CD247	ADAMTS5
CD47	ADAMTS9
CEP70	ADARB2
CHD3	ADCK5
CHI3L1	ADCY10
CHSY1	ADGRA3
CLEC2D	ADGRG6
CLSTN1	ADGRL3
CNNM2	ADH6
CORO7	ADIG
CSF3	ADIPOR2
CTSD	ADPRH
CYP2E1	ADRM1
DCAF4L1	ADSS2
DCLK1	AEBP2
DGKA	AFF2
DLEU2	AFF3
DLK1	AFTPH
DMRT1	AGAP1
DNAJB6	AGBL1
DNAJC15	AGFG1
DOCK9	AGMAT
DYNC1H1	AGO4
EIF4G1	AGPAT5
ELMO1	AGPS
ENTPD8	AGRN
EPHA2	AGXT2
EPHA4	AJAP1
EXOC1	AKAP6
EXOC2	AKR1B15
EXOC3L4	AKT1S1
FAM53B	ALG10
FBXO6	ALKAL1
FLRT2	ALKAL2
FOXK1	ALPK2
FXYD1	AMIGO2
GABRB3	AMMECR1
GFI1	ANGPTL3
GLRX2	ANKRD1
GNG7	ANKRD13B
GRB10	ANKRD17
HOXD3	ANKRD20A3
IFLTD1	ANKRD37
IKBKG	ANKRD6
ITGA5	ANO2
ITPK1	ANP32C
KIAA0319	AP3B1
KIF22	AP4B1
KNDC1	AP5Z1
LAMA3	APBA2
LARS2	APC
LEUTX	APCDD1
LGALS12	API5
LHFPL5	APLF
LHX8	APOBEC2
LMO3	APOC1
LOC284276	AQP11
MAPT	AR
MGEA5	ARHGAP21
MIR1977	ARHGAP23
MPPED1	ARHGAP28
MRPS16	ARHGAP32
MYO10	ARHGAP39
NCOR2	ARHGAP44
NMRAL1	ARHGEF11
NRN1L	ARHGEF37
ODZ2	ARHGEF38
PACS2	ARHGEF4
PCDHB18	ARID3B
PFKFB3	ARMC10
PLEK	ARPC1A
PMEPA1	ARSF
POR	ARSJ
PPP2R2C	ASB1
PRKCH	ASB15
QPRT	ASB4
RAB6B	ASB7
RAPSN	ASGR1
RARA	ASH2L
RB1	ASIC2
RFC2	ASIC3
RFXANK	ASTN2
RIMKLB	ASXL3
RNASE2	ATF7IP
RNF14	ATG2A
RUNX3	ATG4D
SDK1	ATL2
SECISBP2	ATP13A4
SGK1	ATP2A2
SLC23A2	ATP2B2
SLC6A20	ATP2B3
SLFN13	ATP2B4
SLFN5	ATP5MC2
SMAD3	ATP5MGL
SNTG2	ATP6V0A1
SNX22	ATP6V0A2
SORCS2	ATP6V1B1
SORL1	ATP6V1C1
SPAG5	ATP6V1C2
SSBP3	ATP6V1E2
SYT12	ATP7B
TBC1D8B	ATRN
TMCO3	ATXN2L
TMEM63A	ATXN3L
TOX2	ATXN7L1
TRAPPC9	AUTS2
TXK	AVEN
TYROBP	AVIL
UNG	AVPR1B
VTI1A	AXDND1
WDR1	AXIN2
WDR8	AZIN1
WNT16	B3GALT2
XPO5; POLH	B3GAT2
ZFR2	B3GAT3
ZMYND10	B3GNTL1
ZNF438	BACE1
	BATF3
	BCHE
	BCL11A
	BCL2
	BCL2L11
	BCL7A
	BDNF
	BEGAIN
	BEND7
	BEST2
	BEST3
	BHMG1
	BIN3
	BIRC6
	BIRC8
	BLCAP
	BLID
	BMP6
	BMP7
	BMP8A
	BMPR1B
	BMX
	BNC2
	BNIP3L
	BOD1L1
	BOD1L2
	BORCS5
	BPIFB1
	BRAF
	BRCA1
	BRD4
	BRINP1
	BRINP2
	BRIX1
	BRSK2
	BRWD1
	BTBD1
	BTBD18
	BTBD9
	BTD
	BTN3A1
	BTRC
	C10orf67
	C10orf90
	C11orf16
	C11orf49
	C11orf88
	C11orf98
	C12orf4
	C14orf180
	C15orf61
	C16orf95
	C17orf75
	C19orf53
	C19orf84
	C1GALT1
	C1orf115
	C1orf122
	C1orf127
	C1orf21
	C1QL3
	C1QTNF7
	C20orf194
	C20orf203
	C21orf58
	C21orf62
	C2orf72
	C5orf15
	C5orf49
	C5orf58
	C5orf60
	C6orf120
	C6orf163
	C7orf26
	C7orf61
	C8orf34
	C8orf58
	C8orf76
	C8orf89
	C9orf57
	CA10
	CA3
	CAB39
	CACFD1
	CACNA1C
	CACNA1I
	CACNA2D1
	CACNA2D3
	CACNA2D4
	CACNB3
	CACNG3
	CACNG8
	CADM2
	CAMTA1
	CAMTA2
	CAPNS1
	CARD11
	CARMIL2
	CASC4
	CASP3
	CASP7
	CASP8AP2
	CASQ1
	CATSPER2
	CATSPERG
	CBLB
	CBWD3
	CBY2
	CC2D1B
	CCDC102B
	CCDC105
	CCDC121
	CCDC124
	CCDC126
	CCDC157
	CCDC171
	CCDC175
	CCDC180
	CCDC181
	CCDC192
	CCDC27
	CCDC3
	CCDC30
	CCDC33
	CCDC40
	CCDC58
	CCDC60
	CCDC85B
	CCDC88A
	CCDC88B
	CCDC97
	CCL23
	CCNA2
	CCNE2
	CCNL1
	CCT2
	CD14
	CD19
	CD1E
	CD247
	CD302
	CD3EAP
	CD40LG
	CD55
	CD6
	CDC14A
	CDC42EP2
	CDC42SE2
	CDCA7L
	CDH13
	CDH20
	CDH23
	CDH4
	CDH6
	CDK13
	CDK17
	CDK19
	CDK2
	CDK6
	CDK7
	CDKL4
	CDKN3
	CDON
	CDRT15
	CDX2
	CEACAM18
	CEACAM4
	CEBPE
	CEBPZ
	CECR2
	CELF2
	CELF4
	CELSR1
	CEMP1
	CENPL
	CENPN
	CENPP
	CEP104
	CEP41
	CEP63
	CEP85
	CEP89
	CERS4
	CERT1
	CES4A
	CFAP221
	CFAP300
	CFAP44
	CFAP57
	CFAP58
	CFAP70
	CFAP74
	CFHR1
	CFHR4
	CFLAR
	CGNL1
	CHADL
	CHCHD2
	CHIC2
	CHKB
	CHL1
	CHN2
	CHP1
	CHRDL2
	CHRM5
	CHRNA1
	CHRNA7
	CHST12
	CHSY1
	CHSY3
	CIDEA
	CIR1
	CIRBP
	CLDN12
	CLDN24
	CLDN4
	CLEC2L
	CLPB
	CLUH
	CLYBL
	CNIH4
	CNNM1
	CNOT10
	CNOT6
	CNOT6L
	CNPY2
	CNR1
	CNTN2
	CNTN4
	CNTN6
	CNTNAP2
	CNTROB
	COBL
	COCH
	COG2
	COG3
	COG4
	COL12A1
	COL13A1
	COL14A1
	COL15A1
	COL1A1
	COL20A1
	COL26A1
	COL3A1
	COL4A4
	COL6A1
	COL6A2
	COLCA1
	COLCA2
	COMP
	COPS2
	COPS9
	COQ10B
	COQ6
	COX15
	COX7B2
	CPLX4
	CPNE4
	CPPED1
	CPQ
	CPSF4
	CPXCR1
	CPXM1
	CPXM2
	CPZ
	CR1
	CREB5
	CRNN
	CSF3
	CSGALNACT2
	CSMD1
	CSPG4
	CSRNP3
	CSTL1
	CTH
	CTNNA1
	CTNND1
	CTNND2
	CTSF
	CTSO
	CUL2
	CUL4A
	CUL7
	CUX1
	CUX2
	CWC22
	CWF19L1
	CWH43
	CXCL12
	CXCL8
	CXCR5
	CXorf40B
	CXorf58
	CXorf66
	CYP1A1
	CYP2D7
	CYP4F12
	CYP7B1
	CYTH1
	DAB1
	DAB2
	DAB2IP
	DACH1
	DAPK3
	DAZAP1
	DCAF11
	DCAF17
	DCC
	DCP1B
	DCTPP1
	DCUN1D2
	DDX11
	DDX4
	DDX52
	DDX54
	DEFB123
	DEFB124
	DEGS2
	DEK
	DELE1
	DENND1A
	DENND2A
	DENND5B
	DESI1
	DGCR6
	DGKB
	DGKG
	DGKH
	DGUOK
	DHCR7
	DHRS4L1
	DHX15
	DICER1
	DIO2
	DIP2C
	DIRAS2
	DKK2
	DKK4
	DLG2
	DLGAP1
	DLL4
	DLX6
	DMAC2
	DMBX1
	DNAH5
	DNAH7
	DNAH8
	DNAJB11
	DNAJB6
	DNAJC10
	DNAJC11
	DNAJC21
	DNAJC25
	DNAJC27
	DNAJC9
	DNMT1
	DNMT3A
	DNPH1
	DOC2B
	DOCK3
	DOCK4
	DPEP2NB
	DPF3
	DPP10
	DPPA3
	DPPA5
	DPY19L1
	DPY19L4
	DPY30
	DPYD
	DRAXIN
	DRICH1
	DSCAM
	DSCAML1
	DSEL
	DST
	DTNA
	DTNB
	DTWD2
	DUS2
	DUSP16
	DUSP19
	DUSP26
	DUSP27
	DUSP28
	DUSP3
	DUSP6
	DUT
	DYDC1
	DYRK2
	DYRK3
	E2F3
	E2F8
	ECHDC1
	EDA2R
	EDAR
	EDDM3B
	EEF1AKMT2
	EEFSEC
	EFCAB2
	EFCAB3
	EFCAB6
	EFHC1
	EFHD1
	EFNA2
	EFR3A
	EFR3B
	EHBP1
	EHD1
	EIF2B5
	EIF3E
	EIF4A2
	EIF4A3
	EIF5A
	EIF5A2
	ELFN1
	ELMO2
	ELOF1
	ELOVL4
	ELOVL6
	ELP2
	EMC1
	EML3
	ENPEP
	ENSA
	EPB41L3
	EPDR1
	EPHA3
	EPHA4
	EPHB1
	EPHB2
	EPM2A
	EPOR
	EPS15
	ERC2
	ERI1
	ERLIN1
	ERMARD
	ERMP1
	ERO1B
	ERVFRD-1
	ETV2
	EVC2
	EVL
	EXOC6
	EYA1
	EZH1
	F11
	F13A1
	F2R
	F2RL3
	FAAP20
	FAAP24
	FABP4
	FADD
	FAH
	FAM102A
	FAM110B
	FAM117A
	FAM124B
	FAM135A
	FAM149A
	FAM153B
	FAM160A1
	FAM160B1
	FAM162A
	FAM163A
	FAM166C
	FAM169A
	FAM181B
	FAM184A
	FAM184B
	FAM189A1
	FAM199X
	FAM240A
	FAM241B
	FAM24A
	FAM32A
	FAM47C
	FAM49B
	FAM81A
	FAM83F
	FAM89B
	FAM98C
	FANCA
	FAS
	FASTK
	FAT4
	FAXC
	FBH1
	FBL
	FBLIM1
	FBLN5
	FBN1
	FBXL17
	FBXL4
	FBXO11
	FBXO24
	FBXO36
	FBXO44
	FBXO9
	FCAR
	FCRL3
	FDCSP
	FEM1B
	FERMT1
	FEZF2
	FFAR3
	FGD4
	FGF5
	FGFBP3
	FHAD1
	FIBCD1
	FIG4
	FIP1L1
	FIZ1
	FKRP
	FLAD1
	FMN1
	FMN2
	FMNL2
	FNDC1
	FNDC7
	FOPNL
	FOSL2
	FOXA3
	FOXC1
	FOXD3
	FOXD4L3
	FOXK2
	FOXN3
	FOXO4
	FOXP2
	FPR2
	FRAS1
	FRMD3
	FRMD4A
	FRMD4B
	FRMD5
	FRMPD1
	FSCB
	FSIP1
	FSIP2
	FSTL4
	FTCDNL1
	FUOM
	FUT8
	FUT9
	FXYD6
	FYB1
	FZD3
	GABARAPL2
	GABBR2
	GABRA6
	GABRG3
	GADL1
	GAK
	GALNT10
	GALNT15
	GALNT16
	GALNT18
	GALNT7
	GALR1
	GAP43
	GAPDHS
	GATA1
	GATA6
	GATD1
	GBP5
	GBX1
	GC
	GCLC
	GDF15
	GDF7
	GDPD5
	GEMIN5
	GET1
	GFM1
	GFPT1
	GFRA2
	GFRAL
	GGT2
	GGTLC1
	GH1
	GIMAP4
	GLB1L3
	GLDN
	GLI2
	GLIPR1L1
	GLIS3
	GLRX3
	GLS
	GLUL
	GLYAT
	GMPPB
	GNA11
	GNAI2
	GNAL
	GNAS
	GNB5
	GNG10
	GNG12
	GNG4
	GNG7
	GNL2
	GNPAT
	GNRH1
	GOLGA3
	GOLGB1
	GOLPH3
	GOT1L1
	GPC1
	GPC5
	GPC6
	GPNMB
	GPR179
	GPR35
	GPR4
	GPT2
	GRAP2
	GRB2
	GREB1
	GREB1L
	GRID1
	GRIK1
	GRIK2
	GRIK3
	GRIK4
	GRM3
	GRM4
	GRM8
	GSK3A
	GSK3B
	GSTP1
	GSTT4
	GTDC1
	GTF2F2
	GTF2H5
	GTF2I
	GTF3A
	GTF3C1
	GTF3C4
	GUCA1B
	GULP1
	GXYLT2
	GYG1
	GYG2
	H2AC14
	H2AC4
	H2AX
	H2BC1
	H2BC18
	H3-2
	H3C10
	H4C13
	HABP4
	HACD2
	HBP1
	HCN2
	HCN4
	HDAC9
	HDGFL3
	HDLBP
	HEATR3
	HECTD1
	HECTD2
	HECW1
	HEG1
	HEPACAM2
	HERPUD2
	HEXB
	HGF
	HIF1A
	HIGD1B
	HINT3
	HIRA
	HLA-DQB1
	HLCS
	HMGN3
	HMSD
	HNRNPA1
	HNRNPC
	HNRNPL
	HNRNPUL2
	HORMAD1
	HOXC13
	HP1BP3
	HPCAL4
	HPF1
	HPRT1
	HPSE2
	HPX
	HRK
	HS3ST3A1
	HS3ST4
	HS3ST5
	HSBP1L1
	HSD17B1
	HSD17B10
	HSF5
	HSPA6
	HSPB11
	HTR1A
	HTR4
	HTRA1
	HTT
	HUNK
	HUS1B
	HVCN1
	IBSP
	ICAM2
	IDS
	IFNL3
	IFT22
	IGF2BP3
	IGFBP3
	IGFBP6
	IGFBP7
	IKBIP
	IKZF2
	IKZF3
	IKZF5
	IL12B
	IL12RB2
	IL17RC
	IL1A
	IL1R1
	IL1RL2
	IL22RA2
	IL31RA
	IL36B
	ILF2
	IMPA1
	IMPACT
	IMPG1
	INAFM2
	INCA1
	INHBA
	INHBB
	INVS
	IQCM
	IRF4
	ISCA1
	ISCU
	ISM1
	ISX
	ITFG2
	ITGA1
	ITGA3
	ITGA8
	ITGA9
	ITGB6
	ITIH4
	ITM2A
	ITPK1
	JADE3
	JAG2
	JAK2
	JAZF1
	JCAD
	JMY
	JOSD1
	JPH2
	JPT1
	JPT2
	JRKL
	JUP
	KALRN
	KAT6A
	KAZN
	KBTBD6
	KCNA3
	KCNA4
	KCNC1
	KCNC3
	KCND3
	KCNE1
	KCNF1
	KCNG3
	KCNH8
	KCNJ10
	KCNJ11
	KCNK13
	KCNK3
	KCNK9
	KCNMA1
	KCNN2
	KCNN3
	KCNQ1
	KCNQ3
	KCNQ5
	KCTD11
	KCTD16
	KCTD17
	KCTD21
	KCTD5
	KDM2B
	KDM7A
	KDR
	KDSR
	KHDRBS3
	KHNYN
	KIAA0825
	KIAA1191
	KIAA1211L
	KIAA1257
	KIF19
	KIF23
	KIF3B
	KIF5A
	KIR3DL2
	KIRREL3
	KLC1
	KLF12
	KLF13
	KLF3
	KLF5
	KLHDC7A
	KLHL1
	KLHL14
	KLHL17
	KLHL21
	KLHL22
	KLHL24
	KLHL35
	KLK15
	KLK6
	KLRC3
	KMT2B
	KMT5C
	KNG1
	KRIT1
	KRT19
	KRT23
	KRT6A
	KRT82
	KRTAP10-12
	KRTAP10-9
	KRTAP1-4
	KRTAP4-3
	KRTAP5-4
	KRTAP9-3
	L3MBTL3
	LARGE1
	LAX1
	LCE1E
	LCE2A
	LCK
	LCORL
	LDAH
	LDHAL6B
	LDLRAD3
	LEPR
	LEPROT
	LHFPL2
	LHX2
	LIM2
	LIMCH1
	LINS1
	LIPH
	LIX1L
	LOC100996842
	LOC102724957
	LOC112577516
	LOC112694756
	LOC284898
	LOC388813
	LOXHD1
	LOXL2
	LOXL3
	LPAR1
	LPAR2
	LPCAT1
	LRCOL1
	LRFN2
	LRIG3
	LRMDA
	LRMP
	LRP12
	LRP2
	LRP5L
	LRRC10B
	LRRC45
	LRRC49
	LRRC4B
	LRRC4C
	LRRC7
	LRRC72
	LRRC9
	LRTM2
	LSMEM2
	LSS
	LTBR
	LTO1
	LTV1
	LVRN
	LY75
	LYPD1
	LYPD5
	LYPLA1
	LYVE1
	LYZL2
	MAB21L1
	MACROH2A2
	MADCAM1
	MAF1
	MAFK
	MAGI1
	MAL2
	MALRD1
	MAMDC2
	MANBA
	MAP1S
	MAP2K4
	MAP2K5
	MAP2K7
	MAP3K10
	MAP3K21
	MAP3K9
	MAP4K1
	MAP4K5
	MAPK10
	MARCHF11
	MARCHF5
	MARCOL
	MARK3
	MAST1
	MAT1A
	MATN2
	MBD3L2B
	MC2R
	MCC
	MCCC2
	MCM3
	MCM4
	MCM5
	MCM9
	MDGA2
	MDM4
	ME3
	MEAF6
	MED12
	MED16
	MED6
	MEF2C
	MEGF10
	MEGF11
	MEGF9
	MEOX2
	METTL14
	METTL23
	METTL25
	METTL3
	MEX3C
	MFSD4A
	MGAT3
	MGAT4D
	MGLL
	MICALL1
	MICU1
	MIDN
	MIER1
	MINDY4
	MLF2
	MLH1
	MLXIPL
	MME
	MMEL1
	MMP24
	MN1
	MOB3B
	MOCOS
	MOGAT2
	MOGS
	MORC2
	MORC4
	MORF4L1
	MORN5
	MOSMO
	MOSPD2
	MPC1L
	MPP7
	MPZ
	MRFAP1
	MRM2
	MRPL10
	MRPL14
	MRPL15
	MRPL24
	MRPL28
	MRPL3
	MRPL49
	MRPL53
	MRPS16
	MRPS31
	MRPS7
	MS4A3
	MSH3
	MSLN
	MSRB3
	MTA1
	MTAP
	MTBP
	MTHFD1L
	MTHFSD
	MTMR10
	MTMR6
	MTR
	MTREX
	MTX1
	MVB12B
	MYBL2
	MYBPH
	MYCBPAP
	MYH2
	MYH3
	MYH4
	MYH9
	MYL7
	MYLK
	MYLPF
	MYO10
	MYO18B
	MYO1A
	MYO1E
	MYO3A
	MYO5B
	MYO6
	MYORG
	MYRIP
	MYSM1
	MYT1
	MYT1L
	N4BP1
	NABP1
	NABP2
	NAGK
	NAMPT
	NAT1
	NAV1
	NAV2
	NAV3
	NBEAL1
	NCAN
	NCAPG
	NCAPG2
	NCDN
	NCKAP5
	NDC1
	NDC80
	NDST3
	NDUFAF1
	NDUFAF4
	NDUFB10
	NEB
	NECAB2
	NECAP2
	NEK10
	NEK2
	NEK7
	NEK9
	NELL2
	NEMP2
	NETO1
	NFASC
	NFAT5
	NFATC3
	NFE2L3
	NFIB
	NFIL3
	NFKB1
	NFKBID
	NGFR
	NHLRC4
	NHS
	NIBAN2
	NINL
	NIPSNAP3B
	NKAIN2
	NKAIN4
	NKG7
	NKRF
	NKX2-1
	NKX2-2
	NLRP2B
	NMBR
	NME9
	NMNAT2
	NOMO1
	NOP14
	NOTCH3
	NOVA2
	NOX4
	NPAS1
	NPAS3
	NPEPPS
	NPHP1
	NPIPB3
	NPIPB4
	NPL
	NPM1
	NPM3
	NPPA
	NPRL2
	NR2C2AP
	NR2F1
	NR3C2
	NRBP1
	NRG2
	NRGN
	NRIP1
	NSG2
	NSMAF
	NTF3
	NTM
	NTN4
	NTPCR
	NTSR1
	NUAK1
	NUBPL
	NUDT14
	NUP153
	NUP188
	NUP88
	NUSAP1
	NUTF2
	NUTM2A
	NWD1
	NWD2
	NXNL2
	NXPH1
	NYNRIN
	NYX
	OCA2
	ODAM
	OGDHL
	OGFOD2
	OLFM1
	OPRPN
	OR10W1
	OR14C36
	OR1A2
	OR1C1
	OR2D2
	OR2L13
	OR2L2
	OR2M3
	OR4A16
	OR4C13
	OR4X1
	OR52B6
	OR52D1
	OR52E5
	OR52L1
	OR5AU1
	OR5B3
	OR6A2
	OR6C74
	OR6M1
	OR8K1
	ORC2
	OS9
	OSBP2
	OSBPL1A
	OSBPL3
	OSBPL6
	OSCAR
	OSER1
	OSGIN1
	OSM
	OSR1
	OSTF1
	OTOL1
	OTUD7A
	OXER1
	OXR1
	P2RX7
	P4HA2
	P4HB
	PA2G4
	PABPN1L
	PACSIN3
	PAFAH1B1
	PAFAH2
	PAK6
	PALLD
	PAM
	PAN2
	PAPLN
	PAPOLB
	PAPPA2
	PAQR3
	PARD3
	PARPBP
	PATE3
	PBLD
	PBX1
	PBX3
	PCDH9
	PCDHB16
	PCGF2
	PCGF6
	PCIF1
	PCNA
	PCNX4
	PCP4
	PCSK2
	PCSK6
	PCSK9
	PCYOX1
	PDCD1LG2
	PDCD4
	PDCD7
	PDCL
	PDE11A
	PDE2A
	PDE3A
	PDE4D
	PDE4DIP
	PDE6B
	PDGFD
	PDHB
	PDIA2
	PDP2
	PDPN
	PDS5B
	PDZRN3
	PEAK1
	PEAR1
	PEBP4
	PECAM1
	PELP1
	PER1
	PER3
	PET117
	PFDN1
	PFKFB3
	PFN4
	PGAM2
	PGAM4
	PGBD3
	PGBD5
	PGLYRP4
	PGM3
	PGM5
	PGR
	PGRMC2
	PHACTR1
	PHF13
	PHF20
	PHF21B
	PI15
	PICALM
	PIGK
	PIGM
	PIGN
	PIK3AP1
	PIK3C2G
	PIK3R5
	PIN1
	PINK1
	PIP5K1B
	PIPOX
	PIR
	PITRM1
	PITX3
	PKD1L2
	PKHD1L1
	PKIA
	PKM
	PKMYT1
	PKP4
	PLA2G4D
	PLAGL1
	PLB1
	PLCB1
	PLCH2
	PLD1
	PLD5
	PLEKHA5
	PLEKHA7
	PLEKHD1
	PLEKHG6
	PLEKHH1
	PLK1
	PLK3
	PLPP4
	PLPP5
	PLPPR5
	PLSCR3
	PLXDC2
	PMAIP1
	PMF1
	PNKD
	PNPLA3
	PNPO
	POC1B
	POFUT2
	POLE
	POLR1D
	POLR1E
	POLR2F
	PON2
	POU3F1
	POU5F1B
	POU5F2
	PPAN
	PPARGC1B
	PPEF2
	PPFIA2
	PPIE
	PPL
	PPM1A
	PPM1G
	PPP1R13L
	PPP1R16B
	PPP1R2
	PPP1R37
	PPP1R9A
	PPP2R2C
	PPP2R3A
	PPP2R5D
	PPP4R1
	PPTC7
	PRAMEF1
	PRAMEF2
	PRDM13
	PRDM16
	PRDM2
	PRDM6
	PRDM9
	PRDX5
	PREX1
	PRKAA2
	PRKACA
	PRKAR1B
	PRKAR2A
	PRKAR2B
	PRKCH
	PRKD1
	PRKDC
	PRLHR
	PRM3
	PRMT2
	PROM1
	PRPF40A
	PRPS1
	PRR19
	PRRC1
	PRRG4
	PRSS35
	PRSS50
	PRSS54
	PRTG
	PSAP
	PSD2
	PSG1
	PSG3
	PSMA5
	PSMD13
	PSPC1
	PSRC1
	PSTPIP2
	PTER
	PTGER3
	PTGS2
	PTHLH
	PTK2B
	PTPN20
	PTPN5
	PTPRD
	PTPRN2
	PTPRO
	PTPRQ
	PTPRS
	PTPRT
	PTRH2
	PTTG1
	PWWP2A
	PXDNL
	PXMP2
	PXYLP1
	PYGB
	QARS1
	QPCT
	R3HDM2
	RAB11FIP4
	RAB3D
	RAB6B
	RABEP1
	RABGEF1
	RABIF
	RAD21
	RALGAPA2
	RANBP17
	RAP2B
	RAPGEF4
	RAPGEFL1
	RAPSN
	RARB
	RARRES2
	RASA2
	RASA4B
	RASGRF1
	RASGRF2
	RASIP1
	RASSF10
	RBFOX1
	RBM19
	RBM22
	RBM24
	RBM27
	RBMXL2
	RBP7
	RBPMS
	RBX1
	RCC1
	RD3
	RD3L
	RDX
	REEP1
	RELCH
	RELN
	RET
	RFK
	RFTN2
	RFX8
	RGPD2
	RGS13
	RGS17
	RGS22
	RGS7BP
	RHBDL2
	RIC1
	RIMS1
	RIMS2
	RINL
	RIPOR2
	RNASE11
	RNASEH2B
	RNASEK
	RNF115
	RNF126
	RNF133
	RNF141
	RNF144A
	RNF144B
	RNF145
	RNF150
	RNF169
	RNF170
	RNF180
	RNF187
	RNF212
	RNF215
	RNF43
	RNF6
	RNPEPL1
	RNPS1
	ROBO1
	ROBO2
	ROPN1B
	ROR1
	ROR2
	RORA
	ROS1
	RPA2
	RPAP3
	RPEL1
	RPGRIP1
	RPL12
	RPL13
	RPL13A
	RPL18
	RPL22
	RPL27A
	RPL28
	RPL3
	RPL4
	RPP38
	RPS19
	RPS24
	RPS29
	RPS4Y2
	RPS6KL1
	RPS8
	RPUSD4
	RRAS
	RRM1
	RTL5
	RTL8C
	RTN1
	RTN2
	RTP5
	RUBCNL
	RUFY4
	RUNDC3B
	RUNX1T1
	RXFP2
	RYK
	RYR1
	RYR3
	S100A3
	S100PBP
	SAMD14
	SAMD15
	SAMSN1
	SARS2
	SBF2
	SBSPON
	SCAF11
	SCAMP1
	SCARA5
	SCFD2
	SCG3
	SCLY
	SCML4
	SCNN1G
	SCRIB
	SCUBE1
	SDHA
	SDHD
	SDK1
	SDR42E1
	SEC14L5
	SEC22C
	SEC24A
	SEC24D
	SEC61B
	SELE
	SELENOK
	SELENON
	SELENOV
	SEMA4F
	SEMA5A
	SEMA5B
	SENP5
	SEPHS2
	SERPINA3
	SERPINA5
	SERPINB12
	SERPINB3
	SERPINC1
	SERPINE3
	SERPINI2
	SETD1A
	SEZ6L
	SFSWAP
	SFTPA2
	SFXN1
	SFXN5
	SGCG
	SGCZ
	SH2B3
	SH2D4B
	SH3BGR
	SH3D21
	SH3PXD2B
	SHANK2
	SHB
	SHC2
	SHCBP1
	SHCBP1L
	SHH
	SHISA4
	SHISA9
	SHMT1
	SIAH1
	SIAH2
	SIGLEC11
	SIGMAR1
	SIK3
	SINHCAF
	SIRT7
	SLAMF9
	SLC12A2
	SLC12A4
	SLC13A3
	SLC15A5
	SLC16A14
	SLC17A7
	SLC18A2
	SLC18B1
	SLC19A1
	SLC1A1
	SLC1A2
	SLC1A5
	SLC22A1
	SLC22A8
	SLC24A4
	SLC25A21
	SLC25A35
	SLC25A46
	SLC25A53
	SLC26A1
	SLC26A9
	SLC28A2
	SLC28A3
	SLC29A1
	SLC2A5
	SLC2A8
	SLC30A2
	SLC30A6
	SLC35A4
	SLC35B1
	SLC35D1
	SLC35D2
	SLC37A3
	SLC39A4
	SLC39A6
	SLC41A2
	SLC44A3
	SLC44A5
	SLC4A10
	SLC6A1
	SLC6A11
	SLC6A4
	SLC6A5
	SLC7A1
	SLC7A11
	SLC7A14
	SLC8A1
	SLC8A2
	SLC9B1
	SLC9B2
	SLC9C1
	SLC9C2
	SLCO1B3
	SLCO4C1
	SLK
	SLURP2
	SMAD4
	SMAD5
	SMARCA2
	SMARCA5
	SMARCD3
	SMC4
	SMC5
	SMG7
	SMIM14
	SMIM27
	SMPDL3A
	SMTNL2
	SMURF2
	SNAI1
	SNAP47
	SNAP91
	SNCAIP
	SND1
	SNED1
	SNRPD1
	SNRPD2
	SNRPD3
	SNTG1
	SNTG2
	SNTN
	SNX30
	SNX31
	SOBP
	SORBS1
	SORCS2
	SORCS3
	SORT1
	SOX6
	SPAG9
	SPAST
	SPATA17
	SPATA31A6
	SPATS2L
	SPDYC
	SPEN
	SPG11
	SPOCD1
	SPOCK3
	SPRTN
	SPTBN2
	SPTSSA
	SPX
	SRCIN1
	SRGAP3
	SRP9
	SRSF12
	SRSF7
	SSBP3
	SSBP4
	SSH3
	ST14
	ST18
	ST6GAL1
	ST6GALNAC3
	ST7
	ST8SIA5
	STAB1
	STARD6
	STAT2
	STAU1
	STBD1
	STIM1
	STIM2
	STK16
	STK3
	STN1
	STRA6
	STRADA
	STRBP
	STRN
	STT3A
	STYK1
	SUGP1
	SUGT1
	SULF1
	SULF2
	SUMO3
	SUPV3L1
	SURF2
	SUSD1
	SUSD5
	SV2A
	SVEP1
	SYAP1
	SYCE1L
	SYDE2
	SYF2
	SYN3
	SYNPR
	SYS1
	SYT11
	SYT16
	SYT9
	TAB2
	TAC4
	TACC2
	TADA2A
	TAF8
	TAFA1
	TANC2
	TANGO6
	TAPBPL
	TARDBP
	TAS2R5
	TAX1BP1
	TBC1D10A
	TBC1D16
	TBC1D25
	TBC1D30
	TBC1D7
	TBKBP1
	TBP
	TBX21
	TBX5
	TBXAS1
	TCERG1
	TCF12
	TCF20
	TCF3
	TCF7
	TCF7L2
	TCFL5
	TCL1B
	TCP10L
	TCTE3
	TCTN2
	TEAD1
	TEAD4
	TEKT1
	TENM2
	TENM3
	TENM4
	TENT5B
	TESMIN
	TEX26
	TEX35
	TFEC
	TFF1
	TGDS
	TGFBR2
	TGFBR3
	THBS1
	THEG
	THOP1
	THSD4
	THSD7A
	THTPA
	THYN1
	TIFA
	TIGD6
	TIMM44
	TIMP3
	TIPIN
	TIPRL
	TLCD1
	TLE2
	TLK1
	TLL1
	TLL2
	TM7SF3
	TMC1
	TMC5
	TMCO1
	TMED3
	TMEFF2
	TMEM119
	TMEM126B
	TMEM131L
	TMEM132A
	TMEM132B
	TMEM132C
	TMEM132D
	TMEM132E
	TMEM135
	TMEM140
	TMEM154
	TMEM159
	TMEM161B
	TMEM17
	TMEM170A
	TMEM170B
	TMEM174
	TMEM178B
	TMEM179
	TMEM182
	TMEM198
	TMEM219
	TMEM225B
	TMEM230
	TMEM233
	TMEM235
	TMEM249
	TMEM267
	TMEM33
	TMEM41A
	TMEM51
	TMEM61
	TMEM63C
	TMEM65
	TMEM87B
	TMEM88
	TMPRSS11F
	TMPRSS15
	TMPRSS2
	TMPRSS6
	TMTC1
	TMTC4
	TNFAIP8
	TNFRSF10B
	TNFRSF10D
	TNFRSF9
	TNKS1BP1
	TNPO2
	TNS1
	TNS3
	TOM1L2
	TOPAZ1
	TOR1A
	TOR4A
	TOX3
	TPCN2
[truncated: 221 more rows]

## Sheet: BK
				online_db_brain	online_db_blood	CSF
				ALG1L	LARS2	SNTN
				AMZ1	ABCB9	N4BP1
				ANXA2	C1orf200	ZNF557
				APBA1	-	PIGM
				ARHGAP22	-	MEX3C
				ARHGEF12	-	NPIPB4
				ATP8A2	C3orf21	ZC3HAV1
				B4GALNT3	RUNX3	FADD
				B4GALNT3	LAMA3	VASN
				BANF2	CD247	RD3
				C10orf58	AZU1	PRM3
				C10orf71	TMEM63A	SGCZ
				C17orf57	ITGA5	PCSK9
				C1orf52	AZU1	PDGFD
				C21orf56	CCDC57	EFCAB6
				C3orf21	EPHA2	WWC3
				CAPN8	LOC284276	OR4C13
				CCR6	WDR1	TRIO
				CLECL1	PMEPA1	MYO3A
				CNTNAP2	SORL1	CNNM1
				COL11A2	FXYD1	RNF6
				CPAMD8	-	KLF13
				CTNNA2	LGALS12	PRPF40A
				CYFIP2	-	GTF3A
				DCUN1D2	-	SLC7A1
				DIRC3	RARA	ZNF112
				DMBX1	GNG7	MCC
				DNAJA3	TXK	C1GALT1
				DSE	CSF3	PARPBP
				ESRRG	DOCK9	PDE4D
				FAM132A	CHI3L1	SLCO1B3
				FOXK1	CHSY1	C10orf90
				FRK	IKBKG	NPAS3
				GPR125	FAM53B	PSD2
				GSTT1	FOXK1	TRPS1
				GSTT1	MGEA5	TMEM140
				GZMM	EIF4G1	SNX31
				HLA-DRB1	CBX2	CA3
				HLA-DRB1	ITPK1	FBXO11
				HLA-DRB1	TXK	SLC26A9
				HLA-G	RFXANK	GPC6
				JAKMIP3	AMPD3	PRKAR2A
				JAKMIP3	POR	MAP3K21
				KCNH1	-	NUTM2A
				KIAA0513	-	PARD3
				LGALS7	-	RGS13
				LOC100292680	PLEK	SHCBP1
				LOC391322	-	PRKAR1B
				LRRC27	PLEK	NTN4
				LRRK1	-	SENP5
				MAGI2	DLEU2	HP1BP3
				MAPK10	UNG	TCF20
				MCC	CARS2	TCL1B
				MIR886	-	CXCL12
				MIR886	-	TRIM62
				MIR886	DCAF4L1	AGBL1
				MIR886	PRKCH	HNRNPC
				MIR886	CLEC2D	CYP7B1
				MIR886	RNF14	RAB11FIP4
				MMEL1	SNX22	HSF5
				MRPL3	CLSTN1	GRID1
				MYOM2	-	SEC24D
				MYOM2	DGKA	ZNF578
				NDUFA10	GLRX2	TMEM33
				NPHP4	SNX22	VSTM5
				NTM	CTSD	BRSK2
				OPRM1	FBXO6	SLC4A10
				OR10K1	RAPSN	MDM4
				OR12D3	CBL	ULK2
				PCSK9	EXOC1	SULF2
				PIK3R2	GRB10	FAM169A
				PTPRN2	LHFPL5	FBXL4
				PWWP2B	ZNF438	TWIST2
				PYROXD1	SLFN5	KCTD17
				RHOF	TYROBP	TMEM179
				SH3PXD2A	GFI1	EPDR1
				SLC25A24	CALM2	ZSWIM5
				SLC26A10	SSBP3	STRA6
				SMOC2	-	KLHL1
				SMYD3	SLFN13	RBP7
				SPATS2L	MIR1977	SYT16
				SPTBN4	-	UBAC1
				STEAP3		GPC1
				STT3A		MYH3
				TGFBI		SCNN1G
				TLE1		C8orf58
				TMCO3		TMEM61
				TNFSF8		FBXO36
				TRIM27		GLB1L3
				TSPAN9		ZNF263
				TUBA3E		DYDC1
				WDR27		CDK13
				XAB2		SORBS1
				ZNF117		POU3F1
				AATF		CACFD1
				ABCA3		IL36B
				AKAP6		FAM189A1
				ARHGEF10		CPLX4
				ARSB		STAT2
				ASAP2		RHBDL2
				ATP2A3		OSGIN1
				BANP		AMIGO2
				BICD2		PRDM2
				C10orf46		RUNDC3B
				C14orf126		TMCO1
				COL6A3		DLX6
				COQ3		PBX3
				CPLX2		KIAA1191
				CR1L		AQP11
				CUL3		E2F8
				DNAH9		SEC24A
				ERAL1		NRBP1
				FAT1		LOXL3
				FCRLA		WSCD2
				FHIT		RNF141
				FLJ31306		C6orf120
				FLJ32810		UHRF1BP1L
				FLJ37201		MYO6
				GCK		JAZF1
				GFPT2		PGLYRP4
				GFPT2		KDR
				GFPT2		NWD2
				GFPT2		RTP5
				GSTTP1	IFLTD1	RAPGEF4
				GSTTP2		OR14C36
				HLA-DPB2		PPM1A
				HLA-DQA1	RB1	UNC13A
				HLA-DQA1	SYT12	CSPG4
				HLA-DQB1	ZFR2	ADAM20
				HLA-DRB1	IFLTD1	ATP6V1E2
				HLA-DRB1	DLK1	ACSBG1
				HLA-DRB1	PFKFB3	CUX2
				HLA-DRB1		UTP23
				HLA-DRB1		ISCU
				HLA-DRB5	IFLTD1	TMEM233
				HLA-DRB5	AC024575.1	TIMP3
				HLA-DRB5	DLK1	FAM83F
				HLA-DRB6	IFLTD1	MEGF10
				HLA-DRB6		ANO2
				HLA-DRB6	MRPS16	EFNA2
				ITPR1		FHAD1
				KCTD5	DCLK1	CHL1
				LASS3		TSPAN11
				LIMS1	DYNC1H1	TTLL12
				LOC283267	EXOC3L4	TMEM126B
				LRRK1	LMO3	CCDC40
				MAML2		HS3ST5
				MAPT	CYP2E1	WWC2
				MAPT	PACS2	UBE2W
				MMEL1	RAB6B	ABLIM2
				MOG		CDK19
				MORF4	SDK1	ATP2B2
				MRI1	NCOR2	JPT1
				OPRD1		CAB39
				OSBPL9	ABAT	ILF2
				PFKL		ATP6V1C1
				PPIF	ELMO1	PRPS1
				PRHOXNB	RUNX3	B3GALT2
				PRM1	NMRAL1	LINS1
				PVT1	KIAA0319	RPS19
				RASA3	KIF22	FAM89B
				RNF39	SECISBP2	AVIL
				SERPINA9	CEP70	DDX4
				SLC12A5	RIMKLB	MRPL53
				SMC1B	WNT16	NOVA2
				TCP10L2	ENTPD8	SNAP91
				TIMP2	SLC23A2	SLC28A2
				TMEM132B	ARRB2	PPAN
				TMEM9	WDR8	ADGRG6
				TOX2	QPRT	DOCK4
				TPK1	RFC2	LHFPL2
				TRABD	MYO10	GTF2F2
				TRIM10	QPRT	DAB1
				TRIML2	RNASE2	FNDC1
				USP7	SPAG5	SEMA4F
				UST	CCNB3	SFTPA2
				VAV2	ZMYND10	TNPO2
				VPS72	SLC6A20	TAB2
				VSX2	TRAPPC9	PCGF6
				WDR66	C1orf61	LOC388813
				WDR66	POR	MIER1
				YAP1	SNTG2	SLK
				ZNF783	SGK1	CACNA1I
				PTGDS	PPP2R2C	IL12B
					VTI1A	SEPHS2
				PEX19	SORCS2	NTF3
				GNG4	TOX2	EPM2A
				NID1	LHX8	AGFG1
				MICALCL	CHD3	FIG4
				GCC2	HOXD3	RNASEH2B
				PACS2	XPO5; POLH	PKD1L2
				PACS2	DNAJB6	AGPS
				TFDP1	C13orf33	EFHD1
				DNAJC15	AK2	RNF169
				DNAJC15	KNDC1	TMEFF2
				IRF2BP1	MAPT	LRRC7
				MAPK8IP2	PCDHB18	ASTN2
					EXOC2	FSIP2
				C1QTNF7	C20orf11	EPHB2
				DNAJC15	DNAJC15	RASA2
				CORO7		IKBIP
				TMCO3	AP2A2	PTHLH
				MPPED1	CNNM2	TEAD1
				C14orf182	SMAD3	REEP1
					CD47	RPL4
						PAN2
					ATXN7L1	EDAR
					ODZ2	RNPS1
					DMRT1	KIF19
					GABRB3	WDR12
					NRN1L	KDM7A
					LEUTX	NGFR
					BIN1	SLCO4C1
					FLRT2	TANGO6
					CCDC124	CHRNA1
					EPHA4	SLC12A4
					TBC1D8B	ISX
					C1QTNF7	SIK3
					DNAJC15	TSHZ1
					CORO7	TRDMT1
					TMCO3	SULF1
					MPPED1	TSC22D3
					C14orf182	ASXL3
						DESI1
						MANBA
						ERMP1
						TNFRSF10B
						PITRM1
						PLA2G4D
						PGM3
						SHISA9
						CPQ
						NKRF
						PBLD
						RYK
						NFKB1
						LIPH
						PRDM13
						EDA2R
						CFAP57
						SHC2
						LRRC4C
						ZNF658
						NEMP2
						MTR
						TCF12
						TOM1L2
						PNKD
						RNF170
						GNL2
						FLAD1
						MAP1S
						CDON
						LEPROT
						DIRAS2
						MYL7
						DLL4
						TGFBR3
						PXMP2
						KCNC1
						DGKB
						E2F3
						GNB5
						GULP1
						TTLL11
						GYG1
						SLC30A6
						OR5AU1
						IGFBP7
						CDC14A
						PKIA
						DAB2
						RPL22
						SNX30
						CTNND2
						RRAS
						ERLIN1
						CUL7
						KCNN2
						KCNK3
						GPR179
						TLL1
						SYT9
						GBP5
						DEK
						ATP2B3
						CHRNA7
						MLXIPL
						SPTBN2
						STARD6
						CDH23
						MYBPH
						RAPSN
						C1orf115
						EYA1
						RDX
						PLK1
						MFSD4A
						GAP43
						CCDC121
						OSR1
						PAPPA2
						HECTD1
						VMP1
						CSMD1
						F2R
						BRD4
						NEK2
						LTV1
						RNF215
						NECAP2
						KIF5A
						FAM47C
						PPP2R5D
						SRCIN1
						FRMD5
						PDIA2
						RPL3
						TMEM135
						PDCD1LG2
						ERC2
						LOXL2
						NABP2
						PGR
						EPS15
						HUNK
						FOXK2
						ZNF586
						LIX1L
						COL26A1
						GCLC
						GABBR2
						SFXN5
						MTHFD1L
						PITX3
						RGS7BP
						ARHGAP32
						WDR27
						UCP3
						GALNT16
						SMARCA2
						ADIPOR2
						FMNL2
						PTPRN2
						ADIG
						FAM181B
						MC2R
						SLC1A2
						PET117
						CPXM1
						HACD2
						GLRX3
						C1QL3
						MINDY4
						CHRM5
						SPOCK3
						MAP3K10
						CELF4
						CEACAM18
						CYTH1
						CNOT6
						CCDC58
						NMBR
						TBXAS1
						KDM2B
						FBXO24
						PPM1G
						MRFAP1
						RPP38
						TXNDC16
						INCA1
						PKM
						APOC1
						NR2C2AP
						DAB2IP
						GADL1
						ZNF93
						ARHGEF11
						SOBP
						TMEM132D
						LIMCH1
						DLGAP1
						CUL2
						B3GNTL1
						SPAST
						ASIC2
						ADAM10
						CFHR1
						SVEP1
						ITGB6
						ITM2A
						BIRC6
						NTPCR
						GTF3C1
						RANBP17
						KHNYN
						HECW1
						RIPOR2
						DIP2C
						CNTROB
						PSMA5
						NDST3
						SLC6A11
						BATF3
						SLC25A35
						ZFR2
						SEZ6L
						SCARA5
						ZNF222
						CADM2
						FGF5
						MORC2
						SHISA4
						SIGLEC11
						FMN2
						RASSF10
						FAT4
						LYPD1
						LHX2
						NAV2
						PPP2R2C
						QPCT
						RPL27A
						MYO10
						DYRK2
						NFAT5
						IKZF2
						STRBP
						NYX
						TMEM178B
						SLC12A2
						CEP85
						PRKAA2
						TMEM182
						GATD1
						USPL1
						ZNF473
						ZNF395
						VCAN
						LOC284898
						SV2A
						WIPF3
						TTLL6
						METTL3
						ZFPM2
						OR1C1
						CASP8AP2
						AGAP1
						NIPSNAP3B
						ICAM2
						GNPAT
						FBN1
						KCTD16
						HDAC9
						ST6GAL1
						ANP32C
						PXDNL
						RINL
						CR1
						ZFHX3
						MTX1
						ELOVL6
						RCC1
						ASH2L
						KIRREL3
						FEZF2
						HTR4
						GUCA1B
						CXorf40B
						PFDN1
						SLC25A53
						TBC1D10A
						WDR31
						VAV3
						TAFA1
						TCFL5
						FXYD6
						SLC2A5
						CD40LG
						CERS4
						CARMIL2
						KCND3
						CLUH
						RPL13A
						C5orf15
						ERI1
						CREB5
						THSD7A
						STAB1
						PLEKHA5
						EVC2
						SERPINC1
						ADPRH
						BMP6
						IKZF5
						NLRP2B
						SYN3
						SPOCD1
						MDGA2
						COX7B2
						POC1B
						FAM160A1
						ZKSCAN1
						KRTAP5-4
						PGAM2
						VSIG1
						MYT1
						CNTN2
						IL1R1
						A1BG
						FAM163A
						ST8SIA5
						PRTG
						BMP8A
						GRAP2
						GALNT18
						ABCC8
						PIK3AP1
						SMURF2
						PROM1
						DNAJC10
						NFIB
						ATXN3L
						MAMDC2
						PDE2A
						PXYLP1
						TTC28
						SSBP4
						WDR19
						TFF1
						DNMT1
						CASP3
						CD3EAP
						KLC1
						ITIH4
						ZNF487
						CAPNS1
						SMTNL2
						FANCA
						SLC6A5
						CEP104
						EML3
						KLF12
						BCL2
						TMEM132B
						CD302
						LARGE1
						TRIM28
						ZNF641
						ZNF644
						IRF4
						LRP2
						CDC42SE2
						MYH9
						TUBGCP4
						VASP
						KCNN3
						PIGK
						LEPR
						CATSPER2
						CNOT6L
						TTC7B
						COX15
						TMC1
						ZMYM1
						TIGD6
						CACNG3
						TMPRSS2
						PIP5K1B
						BEND7
						PPP2R3A
						SLC15A5
						ZW10
						PRSS54
						FMN1
						MCCC2
						GNAL
						C21orf58
						APBA2
						CFAP221
						NWD1
						EFHC1
						PPP1R16B
						AUTS2
						USP24
						ZKSCAN3
						SCG3
						CEACAM4
						SHB
						TRIM55
						DENND2A
						HS3ST3A1
						TBC1D16
						GRM4
						TMEM119
						C16orf95
						FIP1L1
						ZNF707
						PAK6
						OTUD7A
						EPHA3
						FUOM
						MEAF6
						HOXC13
						BTRC
						WDYHV1
						CDX2
						RIC1
						ADAMTS9
						NOMO1
						CACNA2D3
						WASHC1
						TRAF3IP1
						RPS6KL1
						OR10W1
						C8orf34
						HIGD1B
						ANKRD13B
						RTL5
						CEP63
						FABP4
						HLCS
						ZNF639
						TRHDE
						CEBPE
						LYPLA1
						RIMS1
						SHANK2
						GMPPB
						S100A3
						PLB1
						F13A1
						TAF8
						DACH1
						COG2
						AVPR1B
						SMARCA5
						KIAA0825
						FOXN3
						PSAP
						NUSAP1
						IL22RA2
						PSG1
						OSBPL3
						TFEC
						FAM102A
						CDCA7L
						SNTG1
						SLC28A3
						CXCL8
						NR3C2
						ZNF618
						SEC61B
						GATA1
						TMEM170B
						GALNT15
						CDK7
						GLDN
						SH3PXD2B
						PCSK6
						ENSA
						CUL4A
						BOD1L1
						COL6A1
						SUMO3
						GNG10
						DOC2B
						KIF3B
						SNED1
						SLC7A11
						SDHA
						PTGER3
						PPP1R9A
						C1QTNF7
						CDC42EP2
						PI15
						SCAF11
						PLEKHH1
						RGS22
						EPHB1
						PDE3A
						NPAS1
						EFR3A
						ZNF474
						CPXCR1
						VTI1A
						PTPRQ
						YY1AP1
						P4HB
						RTN1
						PRAMEF1
						F11
						ISM1
						CYP4F12
						BORCS5
						PNPLA3
						EIF5A
						FBH1
						LDLRAD3
						MRPL24
						STIM1
						MALRD1
						SELE
						NKX2-1
						GRIK2
						VKORC1L1
						SYT11
						MYH2
						L3MBTL3
						NFATC3
						TMEM219
						DENND5B
						ROR2
						ZNF740
						NETO1
						CNTN4
						TXNRD3
						DLG2
						SORCS2
						ACMSD
						WNK2
						SLC18B1
						ROS1
						PDE6B
						SYDE2
						NEK7
						DUSP27
						MVB12B
						FAM117A
						METTL25
						CPXM2
						CCT2
						UBE2J1
						CA10
						PDHB
						RPA2
						GTDC1
						SRSF7
						SLC41A2
						ODAM
						USP6
						CCNE2
						SLC8A1
						SERPINE3
						COLCA1
						ARMC10
						SLC9B2
						NCKAP5
						FAM49B
						PLPP5
						MORN5
						NUP153
						HPCAL4
						AFF3
						FGFBP3
						CD6
						CLEC2L
						MMEL1
						CNIH4
						PTPRO
						MICALL1
						KRTAP10-12
						SLC24A4
						TRMT11
						TCF7
						RPGRIP1
						CD1E
						KAT6A
						STYK1
						CLDN4
						CENPN
						MPC1L
						PDZRN3
						ELMO2
						EMC1
						KCNMA1
						RBFOX1
						CEMP1
						PHACTR1
						PCYOX1
						NUAK1
						ACVR1B
						TAPBPL
						LRRC72
						COLCA2
						GLI2
						COL12A1
						PKP4
						GFM1
						CCDC175
						OR52L1
						NEK9
						MRPS31
						NFE2L3
						P4HA2
						TBX5
						AGPAT5
						EIF5A2
						IGFBP6
						FOXO4
						ATRN
						CDH13
						BOD1L2
						CELF2
						ARHGEF38
						STK16
						SORCS3
						KHDRBS3
						MYO5B
						CENPL
						ATP5MC2
						VAV2
						TSC2
						KRTAP4-3
						ABRA
						SNTG2
						KDSR
						SLC44A3
						BCL11A
						ARHGEF37
						ATP2A2
						EHD1
						KALRN
						PLEKHA7
						EZH1
						MSRB3
						DPP10
						RNF150
						ALPK2
						HIF1A
						FAM110B
						SEMA5B
						PIGN
						NKAIN4
						TPGS2
						PRKD1
						MLF2
						GSK3A
						PAPLN
						FUT8
						MGAT4D
						DOCK3
						ZNF654
						DDX11
						MAGI1
						LRRC45
						GSK3B
						GNA11
						FAM149A
						FOSL2
						SRSF12
						SDK1
						TNFAIP8
						PCSK2
						GNG4
						RBM27
						DST
						GREB1L
						DNAJB11
						NIBAN2
						VPS13C
						INHBB
						SNCAIP
						CDKL4
						ATP6V0A2
						BRCA1
						TCTN2
						EPB41L3
						FUT9
						TOX3
						GFPT1
						BTBD18
						NDUFAF1
						KCNK9
						DICER1
						API5
						METTL23
						UGT2B28
						TLK1
						KLHL14
						GLUL
						HNRNPA1
						NPPA
						CCDC102B
						KLHL35
						ELOF1
						MOGS
						MMP24
						CIRBP
						FYB1
						PECAM1
						ASGR1
						DUT
						NMNAT2
						RBPMS
						BLID
						CCDC181
						MME
						ERMARD
						TRMT1L
						FRMD3
						C17orf75
						GRM3
						TCERG1
						SGCG
						RBMXL2
						IMPG1
						TMTC4
						NOP14
						OR52E5
						TSNARE1
						CLYBL
						GRIK1
						CNTN6
						HMSD
						ZBBX
						LOXHD1
						ZNF91
						H2BC18
						H3C10
						THSD4
						SPEN
						OCA2
						CACNA2D1
						KCNQ3
						TREX2
						TLL2
						MRPL49
						PSG3
						GPR4
						ZNF569
						YPEL5
						TRPM7
						PKHD1L1
						DNAJC25
						MTA1
						MARK3
						TACC2
						SLC13A3
						SUGT1
						RFK
						NPL
						IL31RA
						GLYAT
						NBEAL1
						C11orf49
						GAPDHS
						TAS2R5
						DGUOK
						RRM1
						KRT23
						DRAXIN
						FOPNL
						DNAH8
						DUS2
						ANKRD6
						GNG7
						CSTL1
						HEATR3
						SYNPR
						PPP1R37
						TOR4A
						THBS1
						KRT19
						ROR1
						OR6M1
						ATP6V1B1
						FAM184B
						C15orf61
						MED16
						H3-2
						TENM4
						ZFP1
						ST18
						ZFP41
						FOXD3
						ZFAT
						JADE3
						SCAMP1
						GRIK3
						TEAD4
						TMEM198
						IMPACT
						LOC100996842
						SNRPD3
						MCM3
						CELSR1
						PREX1
						MTHFSD
						CIR1
						ZNF705E
						RYR1
						MSH3
						NUP188
						DPY30
						AP4B1
						DENND1A
						ZNF875
						XRCC5
						TXNDC9
						LCE1E
						GABARAPL2
						DMBX1
						SHH
						VSTM4
						FGD4
						SNRPD1
						AVEN
						FSCB
						FAXC
						LTBR
						HSBP1L1
						SLC25A46
						SAMD15
						FTCDNL1
						RASGRF2
						DGKH
						CGNL1
						GSTP1
						LCORL
						CCDC60
						SOX6
						RNASEK
						ZNF823
						MEF2C
						TESMIN
						CXorf66
						SMPDL3A
						C7orf61
						ARHGEF4
						SLC30A2
						LRCOL1
						PDCD7
						MTBP
						PRKCH
						MOSMO
						PDE11A
						DNAJC11
						NPM3
						RXFP2
						MIDN
						PABPN1L
						PTGS2
						C20orf194
						ZNF365
						GSTT4
						TMEM170A
						LRRC49
						MAP4K1
						C1orf21
						POLR1D
						C5orf49
						ITGA8
						MRPL3
						LSS
						LCE2A
						ARID3B
						SLC7A14
						OGDHL
						ABRACL
						AXIN2
						PTRH2
						TTI1
						NCDN
						TMPRSS11F
						TSPAN14
						HMGN3
						ZFP37
						EIF3E
						TXNL1
						APC
						EPHA4
						COCH
						TNS1
						THOP1
						SH2D4B
						CDK6
						ITPK1
						ZSWIM6
						FCRL3
						H2AC14
						ZNF706
						NFASC
						DNPH1
						ZNF678
						KIAA1211L
						BIRC8
						SCUBE1
						PAFAH2
						PRDM6
						RAP2B
						RBM22
						CACNB3
						GGTLC1
						SDHD
						ACER2
						PLPPR5
						LDAH
						DCAF11
						ZBTB43
						PLEKHG6
						ZNF799
						MYSM1
						CDH6
						MYCBPAP
						PCGF2
						HLA-DQB1
						UCP1
						RNPEPL1
						TRAF1
						FAM166C
						TSPAN19
						MAT1A
						PRKAR2B
						SUSD5
						S100PBP
						NAV3
						CPPED1
						AXDND1
						MARCHF5
						NKG7
						ZNF614
						ZEB1
						ELFN1
						TCF7L2
						ADGRA3
						EFCAB3
						RNASE11
						FBXO9
						HBP1
						PYGB
						RPUSD4
						TRAF7
						TNKS1BP1
						RNF180
						ZNF282
						TTC14
						NAV1
						SFSWAP
						CACNG8
						ARHGAP28
						C2orf72
						HNRNPUL2
						STK3
						MARCHF11
						STN1
						PMAIP1
						ITGA9
						DCUN1D2
						SMARCD3
						C20orf203
						MAST1
						LIM2
						EFR3B
						ZASP
						HINT3
						CPZ
						PFN4
						SSBP3
						DUSP28
						TRIM45
						RABEP1
						DHRS4L1
						TBX21
						DAPK3
						KLHL22
						LRIG3
						RELN
						ATXN2L
						NINL
						CNTNAP2
						DNAH5
						SBSPON
						TLCD1
						RABGEF1
						CHSY1
						COL4A4
						OR2D2
						WNK1
						KCNH8
						SUSD1
						JOSD1
						ZMAT2
						SPATS2L
						TBC1D25
						ADGRL3
						CNR1
						TSR2
						RORA
						GPNMB
						CXCR5
						TYR
						BHMG1
						DPPA5
						RELCH
						DEGS2
						H4C13
						TIMM44
						ZCCHC14
						GNRH1
						IL1RL2
						CCDC88A
						PLD5
						TMPRSS6
						PPP1R13L
						CHRDL2
						PLCB1
						LOC112577516
						ATG2A
						CCDC30
						C11orf88
						LRRC9
						PBX1
						MORF4L1
						CHSY3
						PDP2
						SARS2
						ETV2
						NRIP1
						SLC6A4
						KLHL21
						RGPD2
						SLC9C2
						CDK17
						PLSCR3
						MAP3K9
						ZNF711
						VPS37C
						ORC2
						TMEM154
						EXOC6
						FAM24A
						HSD17B10
						CACNA2D4
						SYF2
						JAK2
						UBA2
						CACNA1C
						SPRTN
						EEF1AKMT2
						SLC29A1
						BCL7A
						SYAP1
						GREB1
						ZNF280A
						PLAGL1
						PGM5
						MORC4
						TNS3
						SERPINB3
						PPARGC1B
						MAP2K4
						PAFAH1B1
						EIF4A2
						PPP1R2
						CDH4
						GOLGB1
						C5orf58
						C12orf4
						SLURP2
						SLC44A5
						ITGA1
						SLC39A4
						PELP1
						DCAF17
						TRPV4
						HGF
						OR6C74
						NKAIN2
						COQ6
						COL3A1
						CHP1
						NPEPPS
						KAZN
						ZNF146
						SLC6A1
						GPC5
						COL20A1
						LOC112694756
						HABP4
						KCNA3
						SINHCAF
						HTR1A
						MTAP
						NEB
						YIPF5
						TMEM161B
						PICALM
						BTBD9
						PALLD
						NKX2-2
						HCN2
						ALKAL2
						ATG4D
						BEGAIN
						PPFIA2
						NABP1
						NME9
						PDCL
						COL14A1
						NRG2
						DNMT3A
						SCML4
						HERPUD2
						NPM1
						CPSF4
						MYO18B
						PLK3
						CLDN24
						PTPN20
						ZNF232
						PRSS50
						NOTCH3
						ZEB2
						CTSO
						DDX52
						CHCHD2
						OSCAR
						LRTM2
						COQ10B
						THYN1
						PDCD4
						KCNQ5
						GTF3C4
						CCDC27
						SLC17A7
						ADCY10
						GH1
						PWWP2A
						TMEM132A
						RPL12
						BEST3
						RD3L
						GRM8
						XAGE3
						LOC102724957
						BMP7
						PRDM9
						SNAI1
						CBWD3
						TMEM225B
						LVRN
						TENM2
						PCNX4
						FOXC1
						TRIR
						OPRPN
						PA2G4
						SUGP1
						HUS1B
						CD14
						FEM1B
						MRPS16
						DCC
						GALNT7
						CEP89
						FAM98C
						JAG2
						KLRC3
						FBLIM1
						SLC9C1
						PPL
						CCDC88B
						ST6GALNAC3
						KCNE1
						CEP41
						NXPH1
						MYLPF
						BNIP3L
						DNAH7
						MOCOS
						EVL
						C8orf76
						MTMR6
						AR
						LAX1
						TOR1A
						TCP10L
						JPH2
						NYNRIN
						CTH
						LRRC4B
						CATSPERG
						IBSP
						WDPCP
						TM7SF3
						CHADL
						FAM240A
						EHBP1
						GATA6
						STAU1
						BLCAP
						CERT1
						DNAJC9
						MICU1
						FRMPD1
						EDDM3B
						RUNX1T1
						GGT2
						CWC22
						CFAP300
						ASB4
						HNRNPL
						NFIL3
						FAS
						VAPA
						KCNC3
						FAM124B
						AFTPH
						SND1
						DELE1
						DIO2
						TOPAZ1
						MYH4
						GTF2I
						CIDEA
						COG3
						C7orf26
						WASHC3
						KCNF1
						DUSP16
						C9orf57
						MTREX
						CAMTA1
						GABRA6
						OSTF1
						NAT1
						OSBPL6
						LPAR1
						MED12
						SCRIB
						PTK2B
						C14orf180
						DHCR7
						ADH6
						PLPP4
						KCNG3
						RUFY4
						SH3D21
						JMY
						SPATA17
						C19orf53
						LSMEM2
						TMEM131L
						DRICH1
						BIN3
						BRAF
						PLEKHD1
						CFAP70
						AMMECR1
						CTNNA1
						COL1A1
						ROPN1B
						SELENOV
						GC
						TUBGCP5
						OR2M3
						AKT1S1
						CBY2
						NDUFAF4
						BCL2L11
						CDKN3
						TUBB6
						BRINP1
						SMAD5
						UBLCP1
						PCNA
						ZNF516
						ZNF610
						WNT9B
						PRMT2
						PCIF1
						UBE2K
						PIK3C2G
						CSF3
						KMT5C
						SMIM14
						THEG
						RBX1
						CHIC2
						ACAN
						NDUFB10
						CCDC105
						FAM199X
						XIRP2
						TEKT1
						ALKAL1
						SIRT7
						DUSP3
						MCM5
						DMAC2
						PAQR3
						PEAR1
						KBTBD6
						HDGFL3
						ARPC1A
						DAZAP1
						OXR1
						RUBCNL
						ACACA
						COBL
						STIM2
						ATP5MGL
						RARB
						CD247
						LY75
						H2AC4
						ARHGAP23
						HTRA1
						ZNF83
						MAP4K5
						KLHL17
						MS4A3
						BDNF
						UBE2L6
						DEFB123
						PRSS35
						F2RL3
						PPTC7
						PACSIN3
						PRRG4
						DUSP26
						PIR
						CASQ1
						PTPN5
						CENPP
						PTPRT
						CECR2
						KRTAP1-4
						FRMD4B
						UBAC2
						TIFA
						PRDX5
						HTT
						HPSE2
						KCNK13
						AP5Z1
						MAPK10
						WDR13
						IL12RB2
						ITGA3
						NCAPG2
						ZFYVE9
						DHX15
						ANKRD37
						SAMD14
						TMC5
						KRIT1
						MPZ
						ATF7IP
						BMPR1B
						INVS
						SSH3
						GDPD5
						RASIP1
						TMEM41A
						POLR2F
						KLF3
						CES4A
						ZNF121
						WHRN
						DPYD
						TMEM63C
						PER1
						CRNN
						DPF3
						PTPRS
						AEBP2
						DYRK3
						KCTD5
						SMC4
						GET1
						MOB3B
						NSMAF
						TBC1D7
						HRK
						TPCN2
						LPAR2
						COL6A2
						SPTSSA
						KLF5
						ZFHX4
						VDAC1
						KCTD11
						CTNND1
						CFAP74
						FAM153B
						AJAP1
						AGO4
						FKRP
						OR4A16
						PDE4DIP
						BRINP2
						CD55
						TRIM67
						ACSM6
						AGXT2
						CWF19L1
						HEPACAM2
						NDC1
						DSCAM
						SMAD4
						USP48
						OR2L2
						GOLGA3
						OSBPL1A
						WDR35
						IFNL3
						DGKG
						FBL
						TANC2
						JRKL
						ENPEP
						SLC35A4
						KLHDC7A
						PRDM16
						SLC22A8
						PCDHB16
						LRP12
						FERMT1
						DNAJB6
						PPEF2
						SLC16A14
						RTN2
						SIAH2
						APOBEC2
						MYLK
						MRPL10
						SH3BGR
						FAAP20
						PDS5B
						BTBD1
						HDLBP
						C19orf84
						ITFG2
						SLC19A1
						GFRA2
						HEG1
						MCM9
						DPY19L1
						LRP5L
						GLIPR1L1
						BCHE
						DKK2
						ZNF74
						HSPB11
						DGCR6
						ABRAXAS2
						UGT2B15
						KMT2B
						GABRG3
						SLC26A1
						CCDC180
						FOXD4L3
						CLPB
						OR52D1
						RABIF
						PRLHR
						SLC2A8
						OXER1
						FRAS1
						FAM184A
						TMED3
						UNC13D
						FBLN5
						KLHL24
						NUP88
						FOXP2
						HS3ST4
						EIF4A3
						GTF2H5
						PSTPIP2
						MGAT3
						ATP7B
						DSEL
						TEX26
						CHN2
						DDX54
						ERO1B
						ZNF679
						ATP13A4
						TNFRSF10D
						MEGF11
						TAC4
						NHS
						SLC35D2
						SMIM27
						HPF1
						BNC2
						LRFN2
						CCL23
						TCTE3
						ADCK5
						RET
						MYO1E
						ZNF14
						NECAB2
						PFKFB3
						AFF2
						H2BC1
						INAFM2
						KIAA1257
						CASP7
						LCK
						NUBPL
						SETD1A
						TENM3
						FAM81A
						CLDN12
						POLE
						ISCA1
						NDC80
						ZNF619
						NPHP1
						GNAS
						RNF212
						POLR1E
						BPIFB1
						KIF23
						P2RX7
						ZNF705G
						FBXO44
						GBX1
						XRN2
						HCN4
						C1orf127
						USP9Y
						STRADA
						KLK15
						IL1A
						SLC1A1
						C1orf122
						ZNF443
						CCDC171
						APLF
						SELENON
						PGBD3
						RPAP3
						PRKACA
						DCTPP1
						H2AX
						PRKDC
						CARD11
						LYPD5
						IFT22
						GDF15
						TCF3
						HPRT1
						OR52B6
						PGAM4
						MRPL28
						RPS4Y2
						APCDD1
						TMEM267
						TXNL4A
						SCLY
						MAFK
						SBF2
						SHMT1
						ST7
						SUPV3L1
						GRB2
						SAMSN1
						PDPN
						GOLPH3
						MBD3L2B
						TBC1D30
						MARCOL
						KRT82
						SIGMAR1
						PGBD5
						PMF1
						PSMD13
						MAP2K7
						ANKRD17
						B3GAT3
						MOSPD2
						CDH20
						HPX
						EFCAB2
						TMEM132C
						OTOL1
						MACROH2A2
						RPS29
						TMEM51
						SERPINA5
						FASTK
						CTSF
						SERPINI2
						SPATA31A6
						SHCBP1L
						RPS8
						CAMTA2
						IKZF3
						ANKRD20A3
						TSPEAR
						FRMD4A
						TPH2
						FIBCD1
						KCTD21
						TNFRSF9
						IGF2BP3
						TARDBP
						PHF21B
						GLIS3
						HIRA
						IL17RC
						RNF144B
						DKK4
						SLC1A5
						COPS9
						OR1A2
						CCNL1
						FSIP1
						MLH1
						TSPYL4
						SIAH1
						ECHDC1
						WNT3
						TMEM132E
						RAPGEFL1
						IDS
						PRRC1
						TBKBP1
						KRTAP10-9
						GEMIN5
						C21orf62
						OGFOD2
						TRUB1
						PSRC1
						TRMO
						KLK6
						LYVE1
						ADRM1
						ADAM32
						MEGF9
						RASGRF1
						NELL2
						GDF7
						SMC5
						XKR4
						AP3B1
						TPST1
						RIMS2
						ABAT
						PTPRD
						RYR3
						OLFM1
						UBE2Q1
						RALGAPA2
						TMEM17
						TENT5B
						C8orf89
						KRTAP9-3
						YEATS2
						NHLRC4
						NXNL2
						CCDC192
						LRRC10B
						MCM4
						CXorf58
						SLC9B1
						MRPS7
						OSER1
						BTN3A1
						UBE2H
						FFAR3
						JCAD
						SLC22A1
						UAP1
						ZDHHC20
						TLE2
						NUTF2
						HEXB
						KCNJ11
						RBM24
						AKR1B15
						FBXL17
						ANGPTL3
						ATXN7L1
						RNF133
						NTSR1
						ROBO2
						MGLL
						MAF1
						POU5F2
						CWH43
						HSPA6
						HVCN1
						FCAR
						RPEL1
						ARHGAP44
						KCNQ1
						CCDC85B
						MOGAT2
						BTD
						DTNB
						MYBL2
						ELP2
						NAGK
						RPL18
						MYRIP
						NCAN
						BMX
						FAAP24
						TMEM65
						NCAPG
						RARRES2
						PRAMEF2
						TRIM36
						GFRAL
						PLD1
						NTM
						FAH
						PER3
						FSTL4
						KNG1
						TTPA
						NPRL2
						TADA2A
						DNAJC27
						RNF144A
						RAD21
						PKMYT1
						MYT1L
						NUDT14
						NPIPB3
						GXYLT2
						TAX1BP1
						SERPINB12
						PEBP4
						ZFAND4
						ADAM9
						SLC35D1
						PGRMC2
						ATP6V0A1
						TBP
						TIPRL
						ARSF
						ZNF211
						USP17L10
						EPOR
						ATP2B4
						PATE3
						CFHR4
						ASB15
						CC2D1B
						RNF115
						ATL2
						RFX8
						CPNE4
						GPT2
						CCDC124
						ARHGAP39
						EEFSEC
						POU5F1B
						GYG2
						TMPRSS15
						ZNF665
						DTWD2
						NFKBID
						COL15A1
						C11orf98
						PCP4
						PNPO
						PIN1
						SFXN1
						ZDHHC3
						RASA4B
						PAM
						DPEP2NB
						MED6
						USP8
						DPPA3
						UNC13C
						SPDYC
						UBR3
						USP45
						ZNF724
						FAM162A
						RBM19
						NSG2
						PRR19
						CFLAR
						ZNF806
						TIPIN
						ME3
						FAM241B
						SDR42E1
						MRPL15
						SEMA5A
						BRIX1
						MRPL14
						CHST12
						PHF13
						PPIE
						PTTG1
						RPL13
						ADAMTS5
[truncated: 221 more rows]
